1     **The Polycomb group protein Ring1 regulates dorsoventral patterning**  
2                                    **of the mouse telencephalon**

3  
4  
5  
6     Hikaru Eto<sup>1</sup>, Yusuke Kishi<sup>1\*</sup>, Haruhiko Koseki<sup>2</sup>, Yukiko Gotoh<sup>1,3</sup>

7  
8     <sup>1</sup>Graduate School of Pharmaceutical Sciences, The University of Tokyo, Tokyo  
9     113-0033, Japan

10    <sup>2</sup>Laboratory for Developmental Genetics, RIKEN Center for Integrative Medical  
11    Sciences (RIKEN-IMS), Tsurumi-ku, Yokohama 230-0045, Japan

12    <sup>3</sup>International Research Center for Neurointelligence (WPI-IRCN), The University of  
13    Tokyo, Tokyo 113-0033, Japan

14  
15    \*Correspondence: [ykisi@mol.f.u-tokyo.ac.jp](mailto:ykisi@mol.f.u-tokyo.ac.jp) (Y.K.)

18 **Summary**

19

20 Patterning of the dorsal-ventral (D-V) axis of the mammalian telencephalon is  
21 fundamental to the formation of distinct functional regions including the neocortex and  
22 ganglionic eminences. Morphogenetic signaling by bone morphogenetic protein (BMP),  
23 Wnt, Sonic hedgehog (Shh), and fibroblast growth factor (FGF) pathways determines  
24 regional identity along this axis. It has remained unclear, however, how region-specific  
25 expression patterns of these morphogens along the D-V axis are established, especially  
26 at the level of epigenetic (chromatin) regulation. Here we show that epigenetic  
27 regulation by Ring1, an essential Polycomb group (PcG) protein, plays a key role in  
28 formation of ventral identity in the mouse telencephalon. Deletion of the *Ring1b* or both  
29 *Ring1a* and *Ring1b* genes in neuroepithelial cells of the mouse embryo attenuated  
30 expression of the gene for Shh, a key morphogen for induction of ventral identity, and  
31 induced misexpression of dorsal marker genes including those for BMP and Wnt  
32 ligands in the ventral telencephalon. PcG protein-mediated trimethylation of histone H3  
33 on lysine-27 (H3K27me3) was also apparent at BMP and Wnt ligand genes in wild-type  
34 embryos. Importantly, forced activation of Wnt or BMP signaling repressed the  
35 expression of *Shh* in organotypic and dissociated cultures of the early-stage  
36 telencephalon. Our results thus indicate that epigenetic regulation by PcG proteins—and,  
37 in particular, that by Ring1—confers a permissive state for the induction of *Shh*  
38 expression through suppression of BMP and Wnt signaling pathways, which in turn  
39 allows the development of ventral identity in the telencephalon.

40

41 **Key words**

42 Polycomb group protein, Ring1, dorsoventral patterning, epigenetics, neural  
43 stem-progenitor cell, Sonic hedgehog (Shh), bone morphogenetic protein (BMP), Wnt

44

45

## 46 **Introduction**

47

48 In vertebrate embryos, the telencephalon is formed at the most anterior portion of the  
49 developing central nervous system (CNS). The cerebral cortex (CTX) and ganglionic  
50 eminences (GEs) are derived from the dorsal telencephalon (the pallium) and the ventral  
51 telencephalon (the subpallium), respectively (Campbell, 2003; Hebert and Fishell,  
52 2008). Whereas neural stem-progenitor cells (NPCs) in the CTX produce excitatory  
53 cortical neurons, astrocytes, and some late-born oligodendrocytes, those in the GE  
54 produce local neurons and glial cells that constitute the basal ganglia as well as  
55 inhibitory neurons and early-born oligodendrocytes that migrate tangentially to the CTX.  
56 Regulation of dorsal-ventral (D-V) patterning is thus fundamental to development of the  
57 telencephalon.

58 The regional identity of telencephalic NPCs along the D-V axis is determined  
59 by region-specific transcription factors such as Pax6 and Emx1/2 in the CTX, Gsx2 in  
60 the lateral and medial GE (LGE and MGE, respectively), and Nkx2.1 in the MGE  
61 (Corbin et al., 2003; Kroll and O'Leary, 2005; Simeone et al., 1992; Sussel et al., 1999;  
62 Wigle and Eisenstat, 2008). Mutual gene repression by Pax6 and Gsx2 contributes to  
63 establishment of the D-V boundary (Corbin et al., 2003). *Neurog1* and *Neurog2*,  
64 proneural genes in the CTX, and *Ascl1*, a proneural (and oligodendrogenic) gene in the  
65 GE, are expressed according to the regional identity of NPCs in mouse embryos  
66 (Casarosa et al., 1999; Fode et al., 2000; Toresson et al., 2000).

67 Telencephalic regionalization along the D-V axis begins before closure of the  
68 neural tube, which occurs around embryonic day (E) 9.0 in mice, and is established  
69 before the onset of neurogenesis at ~E10. The initial stages of D-V patterning are  
70 controlled by secreted morphogenetic signals (morphogens) that spread over various  
71 distances. The combination of the activities of different morphogens gives rise to  
72 distinct expression patterns of region-specific transcription factors in the telencephalon  
73 (Gupta and Sen, 2016; Harrison-Uy and Pleasure, 2012; Lupo et al., 2006; Sur and  
74 Rubenstein, 2005), as is also the case in the vertebrate spinal cord (Andrews et al.,  
75 2019) and in invertebrate embryos (Briscoe and Small, 2015). Bone morphogenetic  
76 proteins (BMPs), Wnt ligands, Sonic hedgehog (Shh), and fibroblast growth factor 8  
77 (FGF8) are among the morphogens involved in D-V patterning in the mammalian  
78 telencephalon.

79 The dorsal midline regulates dorsal patterning of the telencephalon (Monuki et  
80 al., 2001). BMPs (BMP4, -5, -6, and -7) are secreted from the dorsal midline and  
81 paramedial neuroectoderm in the prospective forebrain (Furuta et al., 1997) and play

82 pivotal roles in such patterning through induction of target genes including *Msx1*,  
83 *Lmx1a*, and *Wnt3a* (Cheng et al., 2006; Currle et al., 2005; Fernandes et al., 2007;  
84 Furuta et al., 1997; J. A. Golden et al., 1999; Hebert et al., 2002; Panchision et al.,  
85 2001). Knockout of BMP receptors thus results in loss of the dorsal-most structures of  
86 the telencephalon including the cortical hem and choroid plexus (Fernandes et al., 2007).  
87 Wnt ligands are also expressed in the dorsal region (*Wnt1*, -3, -3a, and -7b in the dorsal  
88 telencephalic roof plate at E9.5; *Wnt2b*, -3a, -5a, -7b, and 8b in the cortical hem and  
89 *Wnt7a* and -7b in the CTX at later stages) and contribute to aspects of dorsal patterning  
90 such as formation of the cortical hem and the CTX through induction of various  
91 transcription factors including *Lef1* as well as *Emx1/2*, *Pax6*, and *Gli3*, respectively  
92 (Backman et al., 2005; Galceran et al., 2000; Harrison-Uy and Pleasure, 2012;  
93 Hasenpusch-Theil et al., 2012). In addition, Wnt signaling increases the activity of *Lhx2*,  
94 a selector gene for the CTX (Chou and Tole, 2019; Hsu et al., 2015). Suppression of the  
95 Wnt signaling pathway increases expression of ventral-specific genes throughout the  
96 dorsal pallium, indicating the importance of such signaling in dorsal patterning  
97 (Backman et al., 2005).

98         *Shh*, on the other hand, plays a major role in ventral patterning of the  
99 telencephalon (Blaess et al., 2014). *Shh* is secreted initially from the anterior  
100 mesendoderm or the prechordal plate (Aoto et al., 2009), then from the ventral  
101 hypothalamus, and finally from the rostroventral telencephalon including the preoptic  
102 area and MGE (Ericson et al., 1995; Fuccillo et al., 2004; Mathieu et al., 2002; Rohr et  
103 al., 2001; Shimamura et al., 1995). *Shh* signaling induces the expression of ventral  
104 transcription factors such as *Foxa2*, *Nkx2.1*, and *Gsx2* and suppresses the repressor  
105 activity of *Gli3*, which is crucial for development of the dorsal telencephalon (Jeong  
106 and Epstein, 2003; Kuschel et al., 2003; Rallu et al., 2002; Shimamura and Rubenstein,  
107 1997). *FGF8* expressed in the anterior neural ridge also contributes to formation of the  
108 ventral telencephalon. *FGF* signaling is required for ventral expression of *Shh* and  
109 *Nkx2.1* (Gutin et al., 2006; Shinya et al., 2001; Storm et al., 2006), and, conversely, *Shh*  
110 is required for maintenance of *FGF8* expression at the anterior neural ridge (Hayhurst et  
111 al., 2008; Ohkubo et al., 2002; Rash and Grove, 2007).

112         Expression of BMP ligands and activation of BMP signaling are confined to  
113 the dorsal midline, with this confinement being critical for development of the ventral  
114 telencephalon, given that ectopic BMP signaling can suppress the expression of ventral  
115 morphogenetic factors such as *Shh* and *FGF8* as well as that of the ventral transcription  
116 factor *Nkx2.1* in the chick forebrain (J. A. Golden et al., 1999; Ohkubo et al., 2002). It  
117 is also important that Wnt signaling be confined to the dorsal pallium, given that ectopic

118 activation of such signaling suppresses ventral specification in the developing mouse  
119 telencephalon (Backman et al., 2005). Mutual inhibition between dorsal and ventral  
120 morphogenetic factors explains in part the regional confinement of BMP and Wnt  
121 signaling (Huang et al., 2007; Storm et al., 2003). However, it has remained unclear  
122 whether any epigenetic factors (histone modifiers) participate in the establishment and  
123 maintenance of regional identity along the D-V axis of the developing telencephalon.

124 Polycomb group (PcG) proteins are repressive epigenetic factors that consist  
125 of two complexes, PRC1 and PRC2. These complexes catalyze the ubiquitylation of  
126 histone H2A at lysine-119 (H2AK119ub) and the trimethylation of histone H3 at  
127 lysine-27 (H3K27me3), respectively (Di Croce and Helin, 2013; Simon and Kingston,  
128 2013). PcG proteins were first identified as transcriptional repressors of *Hox* genes in  
129 *Drosophila melanogaster*. These genes maintain regional identity along the  
130 anterior-posterior (A-P) axis in the fly embryo (Maeda and Karch, 2009). In mammals,  
131 PcG proteins also contribute to maintenance of the A-P axis during embryogenesis  
132 through repression of *Hox* genes in the neural tube (Chambeyron et al., 2005) as well as  
133 through that of forebrain-related genes in the midbrain (Zemke et al., 2015). Moreover,  
134 PcG proteins participate in cell subtype specification in the spinal cord (M. G. Golden  
135 and Dasen, 2012) and in the CTX in a manner dependent on temporal codes  
136 (Hirabayashi et al., 2009; Morimoto-Suzuki et al., 2014; Pereira et al., 2010; Sparmann et  
137 al., 2013; Tsuboi et al., 2018). However, it has remained unknown whether PcG  
138 proteins regulate D-V patterning of the mammalian CNS including the telencephalon.

139 We now show that Ring1, an E3 ubiquitin ligase and essential component of  
140 PRC1 (de Napoles et al., 2004; Wang et al., 2004), is required for formation of the  
141 ventral telencephalon. Neural-specific ablation of Ring1B or of both Ring1A and  
142 Ring1B thus attenuated expression of ventral-specific genes such as *Gsx2*, *Nkx2.1*, and  
143 *Ascl1* as well as increased that of dorsal-specific genes such as *Pax6*, *Emx1*, and  
144 *Neurog1* in the telencephalon of mouse embryos. We found that *Shh* expression was  
145 markedly reduced, whereas BMP and Wnt signaling pathways were activated, in the  
146 ventral telencephalon of such Ring1B knockout (KO) or Ring1A/B double knockout  
147 (dKO) embryos. Moreover, Ring1B and H3K27me3 were found to be enriched at the  
148 promoters of several BMP and Wnt ligand genes in the telencephalon of wild-type  
149 (WT) embryos. Consistent with these results, forced activation of BMP or Wnt  
150 signaling suppressed *Shh* expression in explant cultures prepared from the embryonic  
151 telencephalon. Overall, our findings indicate that Ring1 establishes a permissive state  
152 for *Shh* expression in the ventral region of the telencephalon through suppression of  
153 BMP and Wnt signaling in this region.

154

155

## 156 **Results**

157

### 158 **Deletion of *Ring1* in the neuroepithelium results in morphological defects in the** 159 **telencephalon**

160 To investigate the role of PcG proteins in the early stage of mouse telencephalic  
161 development, we deleted *Ring1b* with the use of the *Sox1-Cre* transgene, which confers  
162 expression of Cre recombinase in the neuroepithelium from before E8.5 (Takashima,  
163 2007). We confirmed that expression of the Ring1B protein in the telencephalic wall  
164 was greatly reduced in *Ring1b<sup>flox/flox</sup>;Sox1-Cre* (Ring1B KO) mice at E10 compared  
165 with that in *Ring1b<sup>flox/flox</sup>* or *Ring1b<sup>flox/+</sup>* (control) mice, whereas the abundance of  
166 Ring1B in tissues outside of the telencephalic wall appeared unchanged in the Ring1B  
167 KO embryos (Figure S1A). The expression of Ring1B in the telencephalic wall was also  
168 greatly reduced in mice lacking both Ring1B and its homolog Ring1A (*Ring1a<sup>-</sup>*  
169 *<sup>-/-</sup>;Ring1b<sup>flox/flox</sup>;Sox1-Cre*, or Ring1A/B dKO, mice) compared with that in *Ring1a<sup>-</sup>*  
170 *<sup>-/-</sup>;Ring1b<sup>flox/flox</sup>* or *Ring1a<sup>-/-</sup>;Ring1b<sup>flox/+</sup>* (Ring1A KO) mice (Figure S1B). The level of  
171 H2AK119ub (a histone modification catalyzed by Ring1) in the telencephalic wall was  
172 reduced in Ring1B KO mice and, to a greater extent, in Ring1A/B dKO mice at E10  
173 (Figure 1A–D). These results were consistent with the notion that Ring1A and Ring1B  
174 have overlapping roles in H2A ubiquitylation and that Ring1B makes a greater  
175 contribution to this modification than does Ring1A (Simon and Kingston, 2013).

176 We found that *Ring1b* deletion with the use of *Sox1-Cre* resulted in a  
177 significant reduction in the size of the telencephalon at E11 (Figure 1E, F). Deletion of  
178 *Ring1b* at E13.5 with the use of the *Nestin-CreERT2* transgene was previously found  
179 not to substantially affect the morphology or size of the telencephalon (Hirabayashi et  
180 al., 2009), indicating that Ring1B functions during the early stage of telencephalon  
181 development. The reduction in telencephalon size was also pronounced in Ring1A/B  
182 dKO mice compared with Ring1A KO mice (Figure 1G, H). The number of cells  
183 positive for the cleaved form of caspase-3 (a marker for apoptosis) in the telencephalic  
184 wall was increased in Ring1B KO mice and, to a greater extent, in Ring1A/B dKO mice  
185 at E10 (Figure 1I–K), suggesting that Ring1 is necessary for the survival of  
186 telencephalic cells during the early stage of development and that the reduction in  
187 telencephalic size induced by *Ring1* deletion is due, at least in part, to the aberrant  
188 induction of apoptosis.

189

### 190 **Deletion of *Ring1* attenuates the expression of ventral-specific transcription factors** 191 **in NPCs of the ventral telencephalon**

192 We next investigated whether *Ring1* deletion might affect the D-V axis of the  
193 telencephalon by determining the expression of region-specific transcription factors. We  
194 examined embryos mostly at E10 given the apparently normal telencephalic size in  
195 Ring1B KO mice at this stage. Nkx2.1 is a transcription factor specifically expressed in  
196 the MGE (Sussel et al., 1999), and we found that the expression of this protein was  
197 greatly diminished in Ring1B KO mice at E10 (Figure 2A). The dorsal border of the  
198 Nkx2.1 expression domain was thus shifted ventrally and the abundance of Nkx2.1  
199 within this domain was also reduced by *Ring1b* deletion (Figure 2B, C). The extent of  
200 the loss of Nkx2.1 expression appeared greater in Ring1A/B dKO mice than in Ring1B  
201 KO mice (Figure 2D–F). In addition to its effect on Nkx2.1 expression at the protein  
202 level, *Ring1b* deletion resulted in marked down-regulation of *Nkx2.1* mRNA in CD133<sup>+</sup>  
203 NPCs isolated from the GE of the telencephalon at E11 (Figure 2I). These results thus  
204 indicated that Ring1 is necessary for ventral expression of the MGE marker Nkx2.1.

205 We also examined the expression of Gsx2, which is highly enriched in the LGE  
206 and whose mRNA is present in both the LGE and MGE (Toresson et al., 2000).  
207 Immunostaining indeed revealed the expression of Gsx2 protein within nuclei of NPCs  
208 in the LGE of control mice at E10, whereas such expression was markedly attenuated in  
209 Ring1A/B dKO mice (Figure 2G, H). Moreover, *Ring1b* deletion significantly reduced  
210 the level of *Gsx2* mRNA in CD133<sup>+</sup> NPCs isolated from the GE of the telencephalon at  
211 E11 (Figure 2I). These results together indicated that Ring1 plays a role in expression of  
212 ventral transcription factors in the ventral region of the telencephalon.

213

#### 214 **Deletion of *Ring1* increases the expression of CTX-specific transcription factors in** 215 **NPCs of the ventral telencephalon**

216 We then investigated whether deletion of *Ring1* affects the expression of dorsal-specific  
217 transcription factors in the developing telencephalon. Pax6 contributes to development  
218 of the CTX, with its expression being restricted to the dorsal pallium in mice (Corbin et  
219 al., 2003). However, we found that the expression of Pax6 extended to the ventral  
220 region of the telencephalon in Ring1B KO mice as well as in Ring1A/B dKO mice  
221 (Figure 3A, B, data not shown). Indeed, the dorsoventral gradient of Pax6 expression  
222 was shallower in Ring1B KO mice than in control mice (Figure 3C). We also examined  
223 the role of Ring1 in regulation of Emx1, another CTX-specific transcription factor  
224 (Simeone et al., 1992). Deletion of *Ring1b* increased the amount of *Emx1* mRNA in  
225 CD133<sup>+</sup> NPCs isolated from the GE of the telencephalon at E11 (Figure 3D). These  
226 results together indicated that Ring1 suppresses the expression of dorsal transcription  
227 factors in the ventral region of the telencephalon and thus prevents “dorsalization” of



228 this region during the early stage of development. Of note, deletion of *Ring1b* with the  
229 use of the *Foxg1-IRES-Cre* transgene (that is, from ~E9.0) did not appear to promote  
230 dorsalization of the ventral telencephalon (data not shown), revealing a time window for  
231 sensitivity to Ring1-dependent D-V regionalization.

232

### 233 **Deletion of *Ring1* confers dorsalized expression patterns of proneural genes in the** 234 **ventral telencephalon**

235 Given that *Ring1* deletion appeared to induce dorsalization of the expression patterns of  
236 transcription factors related to NPC specification along the D-V axis, we examined the  
237 expression of proneural genes that contribute to region-specific neuronal differentiation.  
238 The basic helix-loop-helix proteins Neurog1 and Ascl1 are pallium- and  
239 subpallium-specific proneural factors, respectively (Casarosa et al., 1999; Fode et al.,  
240 2000). There was thus little overlap of Neurog1 and Ascl1 expression at the  
241 pallium-subpallium boundary of control mice at E10 (Figure 4A). However, deletion of  
242 *Ring1b* resulted in a ventral shift of the ventral border of Neurog1 expression and a  
243 marked overlap of Neurog1 expression with Ascl1 expression in the ventral region  
244 (Figure 4A–C, Figure S2), again suggesting that loss of Ring1 induces dorsalization of  
245 the early-stage telencephalon. Deletion of *Ring1b* did not obviously shift the dorsal  
246 border of Ascl1 expression (Figure 4C) but significantly reduced the level of Ascl1  
247 within the LGE (Figure 4D). In Ring1A/B dKO mice, the border of the Neurog1<sup>+</sup> region  
248 was also shifted ventrally (Figure 4E), and the level of Ascl1 protein in the ventral  
249 region appeared to be reduced to a greater extent than in Ring1A KO or Ring1B KO  
250 mice (Figure 4F). These results supported the notion that Ring1 plays a pivotal role in  
251 the establishment of ventral identity in the early stage of telencephalic development.

252

### 253 **Ring1 suppresses BMP and Wnt signaling pathways in the early-stage ventral** 254 **telencephalon**

255 We next investigated whether *Ring1* deletion affects the gene expression profile of  
256 NPCs in the ventral telencephalon. Transcripts isolated from CD133<sup>+</sup> NPCs derived  
257 from the GE of the control or Ring1B KO telencephalon at E11 were subjected to RT,  
258 and the resulting cDNA was amplified with the use of the Quartz protocol (Sasagawa et  
259 al., 2013) and subjected to high-throughput sequencing analysis (Figure 5A).  
260 Differentially expressed genes were determined with the use of *edgeR* of the *R* package  
261 (McCarthy et al., 2012; Robinson et al., 2010). We identified more up-regulated genes  
262 (953) than down-regulated genes (238) in ventral NPCs from Ring1B KO mice  
263 compared with those from control mice (Figure 5B, C), consistent with the general role

264 of PcG proteins in gene repression. Importantly, the expression of genes for  
265 dorsal-specific transcription factors such as *Emx1*, *Emx2*, and *Msx1* was up-regulated,  
266 whereas that of genes for ventral-specific transcription factors such as *Nkx2.1* and *Olig2*  
267 (Lu et al., 2000; Takebayashi et al., 2000) was down-regulated, in the NPCs from  
268 Ring1B KO mice (Figure 5B, C, Supplementary Table 1). These results thus confirmed  
269 the role of Ring1 in suppression of the dorsalization of ventral NPCs.

270 To shed light on the mechanism by which Ring1 establishes (or maintains)  
271 ventral identity in ventral telencephalic NPCs, we performed KEGG (Kyoto  
272 Encyclopedia of Genes and Genomes) pathway analysis for both the up-regulated and  
273 down-regulated gene sets (Figure 5D, E). Among the genes whose expression was  
274 up-regulated by *Ring1b* deletion, pathway analysis revealed an enrichment of categories  
275 such as pathways in cancer, extracellular matrix (ECM)–receptor interaction and focal  
276 adhesion (Figure 5D). This enrichment may be due in part to derepression of  
277 protocadherin- $\gamma$  and collagen family genes in Ring1B-deficient NPCs compared with  
278 control NPCs (Supplementary Table 1). Furthermore, we found that Hippo, Wnt, and  
279 transforming growth factor- $\beta$  (TGF- $\beta$ ) signaling pathways were also enriched among  
280 the genes whose expression was up-regulated by *Ring1b* deletion (Figure 5D). The  
281 up-regulated genes categorized in the Hippo signaling pathway included genes related  
282 to BMP and Wnt signaling pathways (Figure 5F). Of interest, the BMP inhibitor gene  
283 *Bmper* was among the top 10 down-regulated genes (Figure 5C). RT-qPCR analysis  
284 also showed that the expression of *Bmp4* and *Id1*, which are major components of BMP  
285 signaling, as well as that of *Wnt7b*, *Wnt8b*, and *Axin2*, which are major components of  
286 Wnt signaling, were increased in Ring1B-null NPCs compared with control NPCs  
287 (Figure 5G). These results together indicated that Ring1B suppresses BMP and Wnt  
288 signaling pathways in NPCs of the ventral telencephalon at E11.

289 We also monitored the activity of the Wnt signaling pathway by examining the  
290 distribution of *Axin2* mRNA with *in situ* hybridization analysis. The highest level of  
291 *Axin2* expression is normally confined to the dorsal midline (presumptive cortical hem),  
292 with a lower level of expression also occurring in the pallium (presumptive neocortex)  
293 of the early-stage telencephalon. However, the region showing the greatest abundance  
294 of *Axin2* mRNA at E10 was expanded in Ring1A/B dKO mice compared with Ring1A  
295 KO mice (Figure 6A, B), suggesting that Ring1 suppresses the activity of Wnt signaling  
296 outside of the dorsal midline in the telencephalon, with the exception of the most ventral  
297 region. We also examined the distribution of Id1 protein as a marker of the activity of  
298 the BMP signaling pathway. The highest level of Id1 expression is normally confined to  
299 the dorsal midline in the early-stage telencephalon, and again deletion of *Ring1a* and

300 *Ring1b* resulted in expansion of this region to the entire ventricular wall of the  
301 telencephalon at E10 (Figure 6C–E). These results suggested that *Ring1* suppresses the  
302 expression of *Id1*, and therefore possibly the activity of BMP signaling, outside of the  
303 dorsal midline at the early stage of telencephalic development.

304

305 **Ring1 promotes *Shh* expression and activates the Shh signaling pathway in the**  
306 **early-stage telencephalon**

307 In contrast to the genes whose expression was up-regulated in *Ring1B*-null NPCs,  
308 KEGG pathway analysis revealed an enrichment of hedgehog signaling pathway among  
309 the down-regulated genes (Figure 5E). Consistent with this observation, we found that  
310 the expression levels of genes related to Shh signaling—such as *Gli1*, *Gli2*, *Ptch1*, and  
311 *Ptch2*—were significantly lower in ventral NPCs from *Ring1B* KO mice compared with  
312 those from control mice at E11 (Figure 7A, B), suggesting that *Ring1B* is essential for  
313 activation of Shh signaling in ventral NPCs at this early stage of telencephalic  
314 development.

315         Given the attenuated expression of Shh target genes in *Ring1B*-deficient  
316 ventral NPCs, we examined whether deletion of *Ring1b* might affect the expression of  
317 *Shh*. *In situ* hybridization analysis of mice at E10 revealed that *Ring1b* deletion  
318 markedly reduced the abundance of *Shh* mRNA (Figure 7C, D), which is normally  
319 found at the ventral midline (presumptive preoptic area) of the developing  
320 telencephalon at this stage (Figure 7C). Furthermore, *Shh* expression was not apparent  
321 in the telencephalon of *Ring1A/B* dKO embryos (Figure 7E). These results together  
322 indicated that *Ring1* is required for expression of Shh, the major ventral morphogen,  
323 which might explain the overall dorsalization phenotype of the *Ring1*-deficient  
324 telencephalon.

325         It remained unclear, however, whether the down-regulation of Shh target gene  
326 expression induced by *Ring1* deletion was due simply to the attenuation of *Shh*  
327 expression or was also due to an inability of NPCs to express these genes in response to  
328 Shh signaling. We therefore prepared *in vitro* cultures of telencephalic NPCs at E10 and  
329 examined their responsiveness to Shh signaling by the addition of a Smoothed agonist  
330 (SAG) for 24 h. The extent of the induction of the Shh target genes *Gli1* and *Ptch1* was  
331 similar for NPCs isolated from *Ring1B* KO mice and from control mice (Figure 8A–C),  
332 suggesting that *Ring1b* deletion did not substantially affect the regulation of these Shh  
333 target genes and that the regulation of *Shh* expression itself is crucial for  
334 *Ring1*-dependent ventral identity.

335         How does *Ring1* promote *Shh* expression? Given the general role of PcG

336 proteins in gene repression, it was plausible that Ring1 indirectly increases *Shh*  
337 expression through repression of genes whose products inhibit *Shh* expression.  
338 Implantation of beads soaked with recombinant BMP in the anterior neuropore of chick  
339 embryos was previously shown to inhibit *Shh* and *Nkx2.1* expression (J. A. Golden et al.,  
340 1999; Ohkubo et al., 2002). Furthermore, forced activation of canonical Wnt signaling  
341 by expression of a stabilized form of  $\beta$ -catenin was found to result in repression of  
342 ventral marker genes such as *Nkx2.1* in the mouse subpallium (Backman et al., 2005). It  
343 was therefore possible that activation of BMP and Wnt signaling pathways might  
344 account for the down-regulation of *Shh* expression in Ring1-deficient mice, although it  
345 remained unclear whether Wnt signaling alone is able to regulate the level of *Shh*  
346 expression. We therefore examined whether activation of Wnt signaling can reduce the  
347 level of *Shh* mRNA in collaboration with BMP signaling in dissociated (monolayer)  
348 cultures and explant cultures prepared from the telencephalon of WT mice at E9. The  
349 addition of an activator of canonical Wnt signaling (the glycogen synthase kinase 3  
350 inhibitor CHIR-99021) indeed significantly reduced the abundance of *Shh* mRNA in the  
351 dissociated telencephalic culture and, to a greater extent, in the explant culture (Figure  
352 8D–G) under the condition. Moreover, exposure to both BMP4 and CHIR-99021 tended  
353 to have a greater effect on the amount of *Shh* mRNA in the dissociated culture than did  
354 either agent alone (Figure 8E, G). The activation of BMP and Wnt signaling pathways  
355 may therefore cooperate to suppress the expression of *Shh* in the telencephalon at this  
356 early stage of development, consistent with the notion that the Ring1-dependent  
357 establishment of ventral identity is mediated by suppression of these signaling  
358 pathways.

359

### 360 **BMP and Wnt ligand genes are direct targets of PcG proteins in early-stage** 361 **telencephalic NPCs**

362 Given the dysregulation of BMP and Wnt ligand gene expression induced by *Ring1*  
363 deletion, we next examined whether these genes are direct targets of PcG proteins by  
364 performing chromatin immunoprecipitation (ChIP)–qPCR assays for H3K27me<sub>3</sub>, a  
365 histone modification catalyzed by PRC2, as well as for Ring1B with the telencephalon  
366 of WT mice at E9. We indeed detected significant or nearly significant deposition of  
367 H3K27me<sub>3</sub> at the promoters of *Bmp4*, *Bmp7*, *Wnt7b*, and *Wnt8b* at levels similar to  
368 those apparent at the promoters of *Hoxa1* and *Hoxd3*, which were examined as positive  
369 controls (Figure 9B). Ring1B was found to be enriched at the promoters of *Bmp4* and  
370 *Wnt8b*, but not at those of *Bmp7* and *Wnt7b* (Figure 9C), suggesting that PcG proteins  
371 directly regulate the expression of at least *Bmp4* and *Wnt8b* in the early-stage

372 telencephalon.

373

374

375 **Discussion**

376

377 Morphogenetic signals and their downstream transcription factors determine regional  
378 identity along the D-V axis in the developing telencephalon. Mutual inhibition between  
379 such signaling plays a pivotal role in segregation of regional identity, but the  
380 contribution of epigenetic mechanisms that control the permissiveness for  
381 transcriptional activation to this telencephalic D-V regionalization have remained  
382 largely unknown. We have now found that Ring1A and Ring1B, core components of  
383 PRC1, play an essential role in establishment of the spatial expression patterns of  
384 morphogenetic signals and transcription factors along the D-V axis and in consequent  
385 regionalization of the telencephalon at the early stage of development. Our results thus  
386 indicate that Ring1 is required for expression of *Shh* in the ventral telencephalon and  
387 that the ablation of *Ring1* results in dorsalization of the ventral telencephalon. This  
388 dorsalization phenotype of the Ring1-deficient telencephalon is likely due in part to  
389 down-regulation of the ventralizing morphogen Shh, given that the inactivation of *Shh*  
390 gives rise to morphological and molecular phenotypes similar to those associated with  
391 *Ring1* deletion, including the induction of a rounder shape and malformation of the  
392 dorsal midline in the telencephalic wall (Chiang et al., 1996; Rallu et al., 2002),  
393 increased apoptosis (Aoto et al., 2009), and attenuated expression of ventral  
394 transcription factors such as Nkx2.1, Gsx2, and Ascl1 (Blaess et al., 2014). Moreover,  
395 our results indicate that Ring1 is required for suppression of BMP and Wnt signaling  
396 pathways and that genes for BMP and Wnt ligands are direct targets of Ring1 and other  
397 PcG proteins. Together with the observations that ectopic activation of BMP signaling  
398 (J. A. Golden et al., 1999; Ohkubo et al., 2002) or Wnt signaling (this study) is able to  
399 suppress the transcription of *Shh* in the developing telencephalon, these results suggest  
400 that Ring1 suppresses BMP and Wnt signaling in the telencephalon (outside of the  
401 dorsal midline) and thereby generates a permissive state for *Shh* expression, which is  
402 essential for establishment of ventral identity (Figure 10). In addition to the activation  
403 of *Shh* expression, suppression of BMP and Wnt signaling pathways *per se* may  
404 contribute to the Ring1-mediated establishment of ventral identity by a Shh-independent  
405 mechanism (Figure 10).

406 Deletion of *Ring1* not only induced dorsalization of NPC identity in the  
407 telencephalon but also resulted in aberrant expression patterns of proneural genes. Ascl1  
408 and Neurog1 are expressed in a mutually exclusive manner in WT embryos, in part as a  
409 result of the repression of *Ascl1* expression by Neurog1 and Neurog2 (Fode et al., 2000).  
410 However, we found that *Ring1b* deletion resulted in a marked increase in the number of

411 cells positive for both *Neurog1* and *Ascl1*. Given that H3K27me3 and H2AK119ub  
412 were previously shown to be deposited at the promoters of *Neurog1* and *Ascl1* in  
413 early-stage NPCs (Hirabayashi et al., 2009; Tsuboi et al., 2018; data not shown), PcG  
414 proteins may participate in the mutually exclusive inhibition of *Neurog1* and *Ascl1*  
415 expression and thereby regulate the segregation of neurogenic properties between  
416 NPCs.

417 Deletion of *Ring1b* with the use of the *Nestin-CreERT2* transgene, which  
418 confers Cre expression in the entire CNS at E13.5 (Hirabayashi et al., 2009), or deletion  
419 of the gene for the histone methyltransferase *Ezh2* with the *Emx1-Cre* transgene, which  
420 is expressed in the dorsal telencephalon from E10.5 (Gorski et al., 2002; Pereira et al.,  
421 2010), has been shown to induce neurogenesis through derepression of neurogenic  
422 genes (Tsuboi et al., 2018). With the use of the *Sox1-Cre* transgene, which is expressed  
423 in the neuroepithelium from before E8.5 (Takashima et al., 2007), we have now  
424 examined the role of *Ring1* in the early stage of telencephalic development, before the  
425 onset of the neurogenic phase. During this early stage (for example, at E9), we did not  
426 detect promotion of neurogenesis (data not shown), suggesting that a  
427 *Ring1*-independent mechanism is responsible for the suppression of neurogenesis at this  
428 time. Of interest, deletion of *Ring1b* with the use of the *Foxg1-IRES-Cre* transgene,  
429 which is expressed in the entire telencephalon from ~E9.0 (Kawaguchi et al., 2016), did  
430 not appear to induce dorsalization of the ventral telencephalon (data not shown),  
431 suggesting that *Ring1*-mediated D-V patterning of the telencephalon takes place only  
432 during the early stage of development, although the mechanism underlying this  
433 temporal restriction remains unclear.

434 A key related question is how PcG proteins are recruited to specific genes in  
435 specific regions of the telencephalon at specific times. Deletion of *Ezh2* in the dorsal  
436 midbrain with the use of the *Wnt1-Cre* transgene was previously shown to result in  
437 inhibition of Wnt signaling and to promote telencephalic identity at ~E11.5 (that is,  
438 rostralization) (Zemke et al., 2015), in contrast to our finding that *Ring1* deletion  
439 activates Wnt signaling in the early-stage telencephalon. This previous study also  
440 showed that *Ezh2* deletion increased the expression of *Wif1* and *Dkk2*, both of which  
441 encode inhibitors of the Wnt signaling pathway, and that H3K27me3 was deposited at  
442 these gene loci in WT embryos, suggesting that PcG proteins contribute to Wnt  
443 activation by repressing these Wnt inhibitor genes in the dorsal midbrain. Mechanisms  
444 by which recruitment of PcG proteins is regulated in a tissue-, cell type-, or  
445 stage-specific manner warrant clarification in future studies.

446 BMP signaling has been shown to be important for establishment of the dorsal

447 midline and its activity to be confined to this region (Hebert et al., 2002; Panchision et  
448 al., 2001; Roy et al., 2014). The relevance of the absence of BMP signaling outside of  
449 the dorsal midline has not been known, however. Our results now suggest that  
450 suppression of BMP signaling outside of the dorsal midline is required for the  
451 expression of *Shh* at the ventral midline and that *Ring1* mediates this suppression and  
452 thereby sets up a permissive state for *Shh* expression. Given that the suppression of  
453 BMP signaling is necessary for neural induction of ectoderm (Wilson and  
454 Hemmati-Brivanlou, 1995), its onset may occur before formation of the prospective  
455 forebrain. BMP signaling-related targets of PcG proteins identified in embryonic stem  
456 cells may be involved in this early process (Shan et al., 2017). The observed increase in  
457 *Id1* expression in the telencephalon (outside of the dorsal midline) in response to *Ring1*  
458 deletion from before E10 suggests that BMP signaling remains repressed in this region  
459 but becomes derepressed at the dorsal midline, although the mechanisms underlying this  
460 difference remain unknown.

461 We found that the targets of PcG proteins in the early-stage telencephalon  
462 include the genes for BMP and Wnt ligands. Of interest, we detected *Ring1B* binding to  
463 BMP and Wnt ligand gene loci in the telencephalon at E9, but the extent of this binding  
464 appeared less than that evident at *Hox* gene loci. In contrast, the levels of H3K27me3  
465 deposition were similar for these two sets of loci. This difference may be due to the  
466 operation of different modes of PcG-mediated repression (Tsuboi et al., 2018). Future  
467 studies are required to reveal which PcG complexes are responsible for the repression of  
468 BMP and Wnt ligand genes.

469 The robust maintenance of the A-P axis through suppression of *Hox* gene  
470 expression by PcG proteins has been well established from flies to mammals (Montavon  
471 and Soshnikova, 2014). We now propose that PcG proteins also play an essential role in  
472 formation of the D-V axis in the early stage of mouse telencephalic development. Our  
473 study thus sheds light on the role of chromatin-level regulation in regionalization of the  
474 brain that is dependent on developmental genes that are not necessarily clustered like  
475 *Hox* genes.

476  
477



478 **Acknowledgments**

479 We thank S. Nishikawa (RIKEN) for providing *Sox1-Cre* mice; I. Nikaido (RIKEN) for  
480 providing tips for the Quartz method; K. Imamura, T. Horiuchi, S. Sugano and Y.  
481 Suzuki (The University of Tokyo) for performing high-throughput-sequencing analysis;  
482 M. Endoh (National University of Singapore) for providing tips for the Ring1B ChIP  
483 assay; Y. Koseki (RIKEN) for providing *Ring1* mutant mice; Y. Maeda, R. Nagayoshi,  
484 and Y. Kakeya for technical assistance; and members of the Gotoh laboratory for  
485 discussion. This research was supported by AMED-CREST of the Japan Science and  
486 Technology Agency (grant JP18gm0610013) and by the Ministry of Education, Culture,  
487 Sports, Science, and Technology of Japan (JSPS KAKENHI grants JP15H05773,  
488 JP16H06481, JP16H06479, and JP16H06279 to Y.G., and JP18K14622, JP19H05253,  
489 and JP16H06279 to Y.K.).

490

491 **Author Contributions**

492 H.E., Y.K., and Y.G. designed the study and wrote the manuscript. H.E. and Y.K.  
493 performed the experiments and analyzed the data. H.K. generated *Ring1a*<sup>-/-</sup>;  
494 *Ring1b*<sup>flox/flox</sup> mice. Y.K. and Y.G. supervised the study.

495

496 **Declaration of Interests**

497 The authors declare no competing interests.

498

499

## 500 **Figure Legends**

501

### 502 **Figure 1. Deletion of *Ring1* in neural tissues results in morphological defects in the**

### 503 **telencephalon**

504 (A, C) Coronal sections of the brain of control (*Ring1b*<sup>flox/flox</sup> or *Ring1b*<sup>flox/+</sup>) or Ring1B  
505 KO (*Ring1b*<sup>flox/flox</sup>;*Sox1-Cre*) mice (A) or of Ring1A KO (*Ring1a*<sup>-/-</sup>;*Ring1b*<sup>flox/flox</sup> or  
506 *Ring1a*<sup>-/-</sup>;*Ring1b*<sup>flox/+</sup>) or Ring1A/B dKO (*Ring1a*<sup>-/-</sup>;*Ring1b*<sup>flox/flox</sup>;*Sox1-Cre*) mice (C)  
507 at E10 were subjected to immunohistofluorescence analysis with antibodies to  
508 H2AK119ub. Nuclei were counterstained with Hoechst 33342. Scale bars, 200  $\mu$ m.

509 (B, D) The ratio of the average immunostaining intensity of H2AK119ub for the entire  
510 telencephalon to that for nonneural tissues adjacent to the ventral telencephalon was  
511 determined as relative intensity (A.U., arbitrary units) for images similar to those in (A)  
512 and (C). Multiple sections of the telencephalon along the rostrocaudal axis were  
513 examined for each embryo. Data are means  $\pm$  s.e.m. of values for three embryos. \*\*\*P <  
514 0.001 (two-tailed Student's unpaired *t* test).

515 (E, G) Images of the brain of control or Ring1B KO mice (E) or of Ring1A KO or  
516 Ring1A/B dKO mice (G) at E10 and E11. Scale bars, 1 mm.

517 (F, H) Quantification of the lateral projected area of the telencephalon at E10 and E11  
518 for images similar to those in (E) and (G). Data are means  $\pm$  s.e.m. of averaged values  
519 from four litters (2-9 embryos per litter). \*\*P < 0.01, \*\*\*P < 0.001; ns, not significant  
520 (two-tailed Student's paired *t* test).

521 (I, K) Coronal sections of the brain of control or Ring1B KO mice (I) or of Ring1A KO  
522 or Ring1A/B dKO mice (K) at E10 were subjected to immunohistofluorescence analysis  
523 with antibodies to the cleaved form of caspase-3. A region (200 by 300  $\mu$ m) of the  
524 ventral telencephalon corresponding to the LGE is shown for each genotype. The neural  
525 tissue (the telencephalic wall) is demarcated by the yellow dotted lines.

526 (J) The average number of cleaved caspase-3 signals in the control and Ring1B KO  
527 mouse telencephalon was determined with coronal section images. Data are means  $\pm$   
528 s.e.m. from three embryos. \*\*P < 0.01 (two-tailed Student's unpaired *t* test).

529

### 530 **Figure 2. Deletion of *Ring1* down-regulates the expression of ventral-specific**

### 531 **transcription factors in NPCs of the ventral telencephalon**

532 (A, D, G, H) Coronal sections of the brain of control or Ring1B KO mice (A) or of  
533 Ring1A KO or Ring1A/B dKO mice (D, G) at E10 were subjected to  
534 immunohistofluorescence staining with antibodies to Nkx2.1 (A, D) or to Gsx2 (G).  
535 Nuclei were counterstained with Hoechst 33342. Boxed regions (300 by 300  $\mu$ m) in (G)

536 are shown at higher magnification in (H). Scale bars, 200  $\mu$ m.  
537 (B, C, E, F) Quantification of immunostaining intensity for Nkx2.1 in images similar to  
538 those in (A) and (D). The Nkx2.1<sup>+</sup> perimeter length as a proportion of total perimeter  
539 length for the telencephalic wall was determined (B, E). The average Nkx2.1  
540 immunostaining intensity within the Nkx2.1<sup>+</sup> region (pixels) was also determined in  
541 arbitrary units (A.U.) for each section, with multiple sections of the telencephalon along  
542 the rostrocaudal axis being examined for each embryo (C, F). Data are means  $\pm$  s.e.m.  
543 of values for three embryos. \*P < 0.05, \*\*P < 0.01 (two-tailed Student's unpaired *t* test).  
544 (I) Reverse transcription (RT) and quantitative polymerase chain reaction (qPCR)  
545 analysis of relative *Nkx2.1* or *Gsx2* mRNA abundance normalized to  $\beta$ -actin mRNA in  
546 CD133<sup>+</sup> NPCs isolated from the GE of control or Ring1B KO mice at E11. Data are  
547 means  $\pm$  s.e.m. of averaged values for four litters (4-7 embryos per litter). \*\*\* P < 0.001  
548 (two-tailed Student's paired *t* test).

549

550 **Figure 3. Deletion of *Ring1* increases the expression of CTX-specific transcription**  
551 **factors in NPCs of the ventral telencephalon**

552 (A, B) Coronal sections of the brain of control or Ring1B KO mice at E10 were  
553 subjected to immunohistofluorescence staining with antibodies to Pax6. Nuclei were  
554 counterstained with Hoechst 33342. Boxed regions (300 by 300  $\mu$ m) in (A) are shown at  
555 higher magnification in (B). Scale bars, 200  $\mu$ m.

556 (C) Quantification of immunostaining intensity of Pax6 for images similar to those in  
557 (A). The telencephalic wall was divided into 10 bins, from 1 (dorsal) to 10 (ventral),  
558 and the average immunostaining intensity of Pax6 was determined in each bin and  
559 normalized by the average value for bin 4. The average intensity was determined from  
560 multiple sections of the telencephalon along the rostrocaudal axis for each embryo. Data  
561 are means  $\pm$  s.e.m. of values from three embryos. \*P < 0.05, \*\*P < 0.01, \*\*\*P < 0.001  
562 versus the corresponding value for control mice (two-tailed Student's unpaired *t* test).

563 (D) RT-qPCR analysis of relative *Emx1* mRNA abundance normalized to  $\beta$ -actin  
564 mRNA in CD133<sup>+</sup> NPCs isolated from the ventral telencephalon of control or Ring1B  
565 KO mice at E11. Data are means  $\pm$  s.e.m. of averaged values for four litters (4-7  
566 embryos per litter). \*\*\* P < 0.001 (two-tailed Student's paired *t* test).

567

568 **Figure 4. Deletion of *Ring1* confers dorsalized expression patterns of proneural**  
569 **genes in the ventral telencephalon**

570 (A, B, E, F) Coronal sections of the brain of control or Ring1B KO mice (A) or of  
571 Ring1A KO or Ring1A/B dKO mice (E) at E10 were subjected to

572 immunohistofluorescence staining with antibodies to Neurog1 and to Ascl1. Nuclei  
573 were counterstained with Hoechst 33342. The boxed regions (200 by 200  $\mu\text{m}$  or 300 by  
574 300  $\mu\text{m}$ ) in (A) and (E) are shown at higher magnification in (B) and (F), respectively.  
575 Green and red arrowheads represent the dorsal and ventral borders of Ascl1<sup>+</sup> and  
576 Neurog1<sup>+</sup> regions, respectively. The telencephalic wall is demarcated by yellow dotted  
577 lines. Note that the Ascl1<sup>+</sup>Neurog1<sup>+</sup> region was enlarged by *Ring1b* deletion. Scale bars,  
578 200  $\mu\text{m}$ .

579 (C, D) Neurog1<sup>+</sup> perimeter length or Ascl1<sup>+</sup> perimeter length was determined as a  
580 proportion of total perimeter length for the telencephalic wall of control and Ring1B  
581 KO mice (C). The average of Ascl1 immunostaining intensity within Ascl1<sup>+</sup> cells in the  
582 LGE (pixels) was also determined for each section and then corrected for the intensity  
583 in the dorsal telencephalon (D). The average intensity of multiple sections of the  
584 telencephalon along the rostrocaudal axis was determined for each embryo. Data are  
585 means  $\pm$  s.e.m. of values from three embryos. \*P < 0.05 (two-tailed Student's paired *t*  
586 test).

587

588 **Figure 5. Genome-wide gene expression analysis of Ring1B-null NPCs derived**  
589 **from the ventral telencephalon**

590 (A) Total RNA isolated from CD133<sup>+</sup> NPCs derived from the GE of control or Ring1B  
591 KO mice at E11 was subjected to RT, and the resulting cDNA was amplified by the  
592 Quartz method and subjected to high-throughput sequencing analysis. A total of three  
593 samples prepared from 1, 1, or 2 embryos was analyzed for each genotype.

594 (B, C) Genes whose expression was up-regulated (B) or down-regulated (C) in NPCs of  
595 Ring1B KO mice were defined as those whose Ring1B KO/control or control/Ring1B  
596 KO fold change, respectively, was  $\geq 1.5$ , with a false discovery rate (FDR) of < 0.15  
597 (left). The list of genes with the 10 lowest P values in each category is also shown  
598 (right).

599 (D, E) Enriched pathways among up-regulated genes (D) and down-regulated genes (E)  
600 were determined by KEGG pathway analysis. For the full list of differentially expressed  
601 genes and enriched pathways, see Supplementary Table 1.

602 (F) Up-regulated genes categorized to the Hippo signaling pathway include genes  
603 related to the BMP signaling pathway (highlighted in yellow) or the Wnt signaling  
604 pathway (highlighted in green).

605 (G) RT-qPCR analysis of the relative abundance of *Bmp4*, *Id1*, *Wnt7b*, *Wnt8b*, and  
606 *Axin2* mRNAs normalized to  $\beta$ -actin mRNA in NPCs of Ring1B KO or control mice.  
607 Data are means  $\pm$  s.e.m. for three or four independent experiments. \*P < 0.05

608 (two-tailed Student's paired *t* test).

609

610 **Figure 6. Deletion of *Ring1* activates BMP and Wnt signaling pathways in the**  
611 **early-stage telencephalon**

612 (A, B) Coronal sections of the brain of Ring1A KO or Ring1A/B dKO mice at E10 were  
613 subjected to *in situ* hybridization analysis of *Axin2* mRNA. Boxed regions (300 by 300  
614  $\mu\text{m}$ ) in (A) are shown at higher magnification in (B). Open arrowheads represent the  
615 boundaries of *Axin2*<sup>high</sup> regions. Scale bars, 200  $\mu\text{m}$ .

616 (C, D) Coronal sections of the brain of Ring1A KO or Ring1A/B dKO mice at E10 were  
617 subjected to immunohistofluorescence staining with antibodies to Id1. Boxed regions  
618 (150 by 200  $\mu\text{m}$ ) in (C) are shown at higher magnification in (D). Nuclei were  
619 counterstained with Hoechst 33342. The neural tissue (telencephalic wall) is outlined by  
620 yellow dotted lines. Scale bars, 200  $\mu\text{m}$ .

621 (E) Quantification of Id1 immunostaining intensity in the telencephalon inside and  
622 outside of the dorsal midline. The average intensity of Id1 signals in the dorsal 10% and  
623 ventral 90% of the telencephalic wall was determined from images similar to those in  
624 (C). The average of multiple sections of the telencephalon along the rostrocaudal axis  
625 was determined as a representative score for each embryo. Data are means  $\pm$  s.e.m. of  
626 values for three embryos of each genotype. \*\*\* $P < 0.001$  (two-tailed Student's unpaired  
627 *t* test).

628

629 **Figure 7. Deletion of *Ring1* attenuates the expression of *Shh* in the telencephalon**

630 (A) The RPKM (reads per kilobase of mRNA model per million total reads) scores for  
631 *Gli1*, *Gli2*, *Ptch1*, and *Ptch2* in the RNA-sequencing analysis shown in Figure 5A were  
632 normalized by those for the corresponding control sample in each experiment. Data are  
633 means  $\pm$  s.e.m. of values from three experiments. \* $P < 0.05$ , \*\* $P < 0.01$ , \*\*\* $P < 0.001$   
634 (two-tailed Student's paired *t* test).

635 (B) RT-qPCR analysis of relative *Ptch1* mRNA abundance normalized to  $\beta$ -actin  
636 mRNA in ventral NPCs of Ring1B KO or control mice at E11. Data are means  $\pm$  s.e.m.  
637 of values from four independent experiments. \*\*\* $P < 0.001$  (two-tailed Student's paired  
638 *t* test).

639 (C, E) Coronal sections of the brain of control or Ring1B KO mice (C) or of Ring1A  
640 KO or Ring1A/B dKO mice (E) at E10 were subjected to *in situ* hybridization analysis  
641 of *Shh* mRNA. Scale bars, 200  $\mu\text{m}$ .

642 (D) The *Shh*<sup>+</sup> perimeter length as a proportion of total perimeter length for the  
643 telencephalic wall determined from sections similar to those in (C). The average *Shh*<sup>+</sup>

644 signal intensity for multiple sections of the telencephalon along the rostrocaudal axis  
645 was determined for each embryo. Data are means  $\pm$  s.e.m. of values for three embryos  
646 of each genotype. \* $P < 0.05$  (two-tailed Student's unpaired  $t$  test).

647

648 **Figure 8. Forced activation of the BMP and Wnt pathways inhibits *Shh* expression**  
649 **in early-stage telencephalic NPCs**

650 (A) NPCs isolated from the telencephalon (outside of the dorsal midline) of control or  
651 Ring1B KO mice at E10 were cultured as monolayers for 6 h, exposed for an additional  
652 24 h to 2  $\mu$ M Smoothed agonist (SAG) or dimethyl sulfoxide vehicle, and then  
653 subjected to RT-qPCR analysis.

654 (B, C) RT-qPCR analysis of relative *Gli1* (B) and *Ptch1* (C) mRNA abundance  
655 normalized to  $\beta$ -actin mRNA in NPCs treated as in (A). Data are means  $\pm$  s.e.m. for  
656 three independent experiments. \*\*\* $P < 0.001$  (one-way ANOVA followed by  
657 Bonferroni's multiple-comparison test).

658 (D, F) The telencephalon of WT (ICR) mice at E9 was subjected to dissociation for  
659 monolayer culture (D) or was cultured as an explant (F) for 6 h before exposure for an  
660 additional 24 h to BMP4 (50 ng/ml) or 5  $\mu$ M CHIR-99021 as indicated followed by  
661 RT-qPCR analysis.

662 (E, G) RT-qPCR analysis of relative *Shh* mRNA abundance normalized to  $\beta$ -actin  
663 mRNA in cultures as in (D) and (E), respectively. Data are means  $\pm$  s.e.m. for four  
664 independent experiments. \* $P < 0.05$ , \*\*\* $P < 0.001$  (one-way ANOVA followed by  
665 Bonferroni's multiple-comparison test).

666

667 **Figure 9. H3K27me3 deposition and Ring1B binding to the promoters of *Bmp4* and**  
668 ***Wnt8b* in early-stage telencephalic NPCs**

669 (A) The telencephalon was isolated from WT (ICR) mice at E9 for ChIP-qPCR analysis  
670 with antibodies to H3K27me3 or to Ring1B.

671 (B, C) ChIP-qPCR analysis of H3K27me3 deposition (B) and Ring1B binding (C) at the  
672 indicated promoters. *Hoxa1* and *Hoxd3* were examined as positive controls, and *Gapdh*  
673 and the  $\beta$ -actin gene as negative controls. Data are expressed as the percentage to input  
674 value and are means  $\pm$  s.e.m. for three independent experiments. \* $P < 0.05$ , \*\* $P < 0.01$ ,  
675 \*\*\*  $P < 0.001$  versus the corresponding value for the  $\beta$ -actin gene (two-tailed Student's  
676 unpaired  $t$  test).

677

678 **Figure 10. Schematic summary of Ring1-mediated ventral specification in the**  
679 **early-stage mouse telencephalon**

680 Ring1 suppresses BMP and Wnt signaling pathways outside of the dorsal midline at the  
681 early stage of mouse telencephalic development and thereby confers a permissive state  
682 for *Shh* expression. *Shh*-inducing signals to the most ventral portion of telencephalon  
683 thus can induce *Shh* in this region, resulting in the ventral patterning of telencephalon.  
684 By contrast, Ring1 ablation derepresses and ectopically activates BMP and Wnt  
685 signaling pathways outside of the dorsal midline, and thus suppresses Shh-mediated  
686 ventral patterning of telencephalon.  
687

## 688 **Materials and Methods**

689

### 690 **Animals**

691 *Ring1b*<sup>flox/flox</sup> or *Ring1a*<sup>-/-</sup>;*Ring1b*<sup>flox/flox</sup> mice (Calés et al., 2008; Endoh et al., 2008)  
692 were crossed with *Sox1-Cre* transgenic mice (Takashima et al., 2007). Jcl:ICR (CLEA  
693 Japan) or Slc:ICR (SLC Japan) mice were studied as WT animals. All mice were  
694 maintained in a temperature- and relative humidity-controlled (23° ± 3°C and 50 ± 15%,  
695 respectively) environment with a normal 12-h-light, 12-h-dark cycle. They were housed  
696 two to six per sterile cage (Innocage, Innovive; or Micro BARRIER Systems, Edstrom  
697 Japan) with chips (PALSOFT, Oriental Yeast; or PaperClean, SLC Japan), irradiated  
698 food (CE-2, CLEA Japan), and filtered water available ad libitum. Mouse embryos were  
699 isolated at various ages, with E0.5 being considered the time of vaginal plug appearance.  
700 All animals were maintained and studied according to protocols approved by the  
701 Animal Care and Use Committee of The University of Tokyo.

702

### 703 **Plasmid constructs**

704 A pBluescript SK(-) vector encoding mouse Shh was kindly provided by D. Kawaguchi  
705 (The University of Tokyo). A portion of the *Axin2* cDNA was cloned by PCR from  
706 cDNA derived from the mouse telencephalon and was subcloned into pBluescript SK(-).  
707 Amplified sequences are presented in Supplementary table 2.

708

### 709 **Antibodies**

710 Antibodies for immunofluorescence and ChIP analyses included mouse antibodies to  
711 Ascl1 (Mash1, BD Pharmingen, 556604, 1:500) and H3K27me3 (MBL, MABI0323, 2  
712 µg/sample for ChIP), goat antibodies to Neurog1 (Santa Cruz, sc-19231, 1:200) and  
713 rabbit antibodies to H2AK119ub (Cell Signaling Technology, 8240S, 1:1000), Ring1B  
714 (Cell Signaling Technology, 5694S, 1:200, 3 µg/sample for ChIP), Cleaved caspase-3  
715 (Cell signaling Technology, 9664S, 1:1000), Nkx2.1 (TTF1, Abcam, ab76013, 1:1000),  
716 Gsx2 (Gsh2, Millipore, ABN162, 1:200), Pax6 (Millipore, AB2237, 1:500) and Id1  
717 (Biocheck, BCH-1/37-2, 1:200). Alexa-labeled secondary antibodies and Hoechst  
718 33342 (for nuclear staining) were obtained from Molecular Probes.

719

### 720 **Immunohistofluorescence analysis**

721 Immunohistofluorescence staining was performed as previously described  
722 (Morimoto-Suzki et al., 2014), with minor modifications. In brief, embryos were fixed  
723 for 3 h with 4% paraformaldehyde in phosphate-buffered saline (PBS), incubated



724 overnight at 4°C with 30% sucrose in PBS, embedded in OCT compound (Sakura  
725 Finetek), and sectioned with a cryostat at a thickness of 10 µm. The sections were  
726 exposed to 0.1% Triton X-100 and 3% bovine serum albumin in Tris-buffered saline  
727 (blocking solution) for 1 h at room temperature before incubation first overnight at 4°C  
728 with primary antibodies diluted in blocking solution and then for 1 h at room  
729 temperature with fluorophore-labeled secondary antibodies also diluted in blocking  
730 solution. They were finally mounted in Mowiol (Calbiochem) for imaging with a  
731 laser-scanning confocal microscope (TSC-SP5, Leica) and ImageJ software (NIH).

732

### 733 **Isolation of ventral NPCs by FACS**

734 The ventral telencephalon was dissected and subjected to enzymatic digestion with a  
735 papain-based solution (Sumitomo Bakelite). Cell suspensions were stained with  
736 allophycocyanin-conjugated antibodies to CD133 (141210, BioLegend) at a dilution of  
737 1:400 and were then subjected to fluorescence-activated cell sorting (FACS) with a  
738 FACSaria instrument (Becton Dickinson). CD133<sup>+</sup> NPCs were isolated as the top 50%  
739 of allophycocyanin-positive cells.

740

### 741 **Quartz-seq analysis**

742 Both cDNA synthesis and amplification were performed with total RNA from 2000  
743 cells as described previously (Sasagawa et al., 2013). In brief, total RNA was purified  
744 from cells with the use of Ampure XP RNA (Beckman) and subjected to RT with Super  
745 Script III (Thermo Scientific), and the resulting cDNA was purified with Ampure XP  
746 (Beckman) and treated with ExoI (Takara) for primer digestion. After addition of a  
747 poly(A) tail with terminal deoxynucleotidyl transferase (Roche), the cDNA was  
748 subjected to second-strand synthesis and the resulting double-stranded cDNA was  
749 amplified with the use of MightyAmp DNA polymerase (Takara). The amplified cDNA  
750 was prepared for sequencing with the use of a Nextera XT DNA Sample Prep Kit  
751 (Illumina) and subjected to deep sequencing analysis on the Illumina HiSeq2500  
752 platform to yield 36-base single-end reads. Approximately 20 million sequences were  
753 obtained from each sample. Sequences were mapped to the reference mouse genome  
754 (mm9) with ELAND v2 (Illumina). Only uniquely mapped tags with no base  
755 mismatches were used for the analysis. Gene expression was quantitated as reads per  
756 kilobase of mRNA model per million total reads (RPKM) on the basis of RefSeq gene  
757 models (mm9).

758

### 759 **RT-qPCR analysis**

760 Total RNA was isolated from cells with the use of RNAiso plus (Takara), and up to 0.5  
761  $\mu\text{g}$  of the RNA was subjected to RT with the use of ReverTra Ace qPCR RT Master  
762 Mix with gDNA remover (Toyobo). The resulting cDNA was subjected to real-time  
763 PCR analysis in a LightCycler 480 instrument (Roche) with either KAPA SYBR FAST  
764 for LightCycler 480 (Kapa Biosystems) or Thunderbird SYBR qPCR mix (Toyobo).  
765 The amount of each target mRNA was normalized by that of  $\beta$ -actin mRNA. Primer  
766 sequences are presented in Supplementary table 2.

767

### 768 ***In situ* hybridization analysis**

769 For preparation of digoxigenin-labeled riboprobes, linearized plasmids containing probe  
770 sequences were incubated for 3 h at 37°C with DIG RNA Labeling Mix, Transcription  
771 Buffer, and RNA polymerase (Roche) as well as RNase inhibitor (Toyobo). The  
772 plasmids were then digested with DNaseI (Takara) for 30 min at 37°C, after which the  
773 DNase reaction was stopped by the addition of Stop Solution (Promega). Synthesized  
774 riboprobes were purified with the use of a ProbeQuant G-50 column (GE Healthcare)  
775 and diluted with hybridization buffer (5 $\times$  Denhardt's solution, 5 $\times$  standard saline citrate,  
776 50% formamide, tRNA at 250  $\mu\text{g}/\text{ml}$ , salmon testis DNA at 200  $\mu\text{g}/\text{ml}$ , heparin at 100  
777  $\mu\text{g}/\text{ml}$ , and 0.1% Tween 20). The riboprobes (0.5  $\mu\text{g}/\text{ml}$ ) were denatured at 85°C for 5  
778 min, placed on ice for 2 min, and then maintained at 65°C before in situ hybridization.  
779 Embryos were fixed for 3 h (*Shh*) or overnight (*Axin2*) with 4% paraformaldehyde in  
780 PBS and then incubated with 30% sucrose in PBS, embedded, and sectioned as  
781 described for immunohistofluorescence analysis. Sections were fixed for 10 min with  
782 4% paraformaldehyde in PBS, washed with 0.1% Tween 20 in PBS, and incubated at  
783 room temperature first with 0.1 M triethanolamine for 3 min and then with the same  
784 solution containing 0.1% acetic anhydride for 10 min. They were washed again with  
785 0.1% Tween 20 in PBS before incubation at 65°C first for 1 h with hybridization buffer  
786 and then overnight with denatured RNA probes within a humidified box with 50%  
787 formamide. The sections were washed twice for 30 min at 65°C with 2 $\times$  standard saline  
788 citrate, twice for 30 min at 65°C with the same solution containing 50% formamide, and  
789 three times for 5 min at room temperature with 0.1% Tween 20 in MAB buffer (MABT).  
790 After exposure for 1 h at room temperature to 10% fetal bovine serum in MABT, the  
791 sections were incubated overnight at 4°C with alkaline phosphatase-conjugated  
792 antibodies to digoxigenin (Roche) at a dilution of 1:2000 in the same solution, washed  
793 twice for 10 min at room temperature with MABT and twice for 10 min at room  
794 temperature with a solution containing 100 mM Tris-HCl (pH 9.5), 100 mM NaCl, 50  
795 mM  $\text{MgCl}_2$ , and 0.02% Tween 20, and then incubated at room temperature in the same

796 solution containing NBT-BCIP (nitrotetrazolium blue chloride at 350 µg/ml and  
797 5-bromo-4-chloro-3-indolyl phosphate *p*-toluidine salt at 175 µg/ml) (Roche) until the  
798 color appeared. They were finally washed with 0.1% Tween 20 in PBS and mounted in  
799 Mowiol (Calbiochem). Images were acquired with an Axiovert 200M microscope fitted  
800 with an Axiocam or Axiocam 305 camera (Carl Zeiss) and were processed with ImageJ  
801 (NIH).

802

### 803 **ChIP-qPCR analysis**

804 ChIP for Ring1B and H3K27me3 was performed as previously described (Tsuboi et al.,  
805 2018), with minor modifications. Cells were fixed with 1% formaldehyde and then  
806 suspended in radioimmunoprecipitation (RIPA) buffer for sonication (10 mM Tris-HCl  
807 at pH 8.0, 1 mM EDTA, 140 mM NaCl, 1% Triton X-100, 0.1% SDS, 0.1% sodium  
808 deoxycholate). They were subjected to ultrasonic treatment to shear genomic chromatin  
809 into DNA fragments, and the cell lysates were then diluted with RIPA buffer for  
810 immunoprecipitation (50 mM Tris-HCl at pH 8.0, 150 mM NaCl, 2 mM EDTA, 1%  
811 Nonidet P-40, 0.1% SDS, 0.5% sodium deoxycholate) and incubated for 1 h at 4°C with  
812 ProteinA/G Magnetic Beads (Pierce) to clear nonspecific reactivity. They were then  
813 incubated overnight at 4°C with ProteinA/G Magnetic Beads that had previously been  
814 incubated overnight at 4°C with antibodies to Ring1B or to H3K27me3. The beads were  
815 then isolated and washed three times with wash buffer (2 mM EDTA, 150 mM NaCl,  
816 0.1% SDS, 1% Triton X-100, and 20 mM Tris-HCl at pH 8.0) and then once with wash  
817 buffer containing 500 mM NaCl. Immune complexes were eluted from the beads with a  
818 solution containing 10 mM Tris-HCl (pH 8.0), 5 mM EDTA, 300 mM NaCl, and 0.5%  
819 SDS at 65°C for 15 min, and they were then subjected to digestion with proteinase K  
820 (Nakarai) at 37°C for more than 6 h, removal of cross links by incubation at 65°C for  
821 more than 6 h, and extraction of the remaining DNA with phenol–chloroform–isoamyl  
822 alcohol and ethanol. The DNA was washed with 70% ethanol, suspended in water, and  
823 subjected to real-time PCR analysis in a LightCycler 480 instrument (Roche) with  
824 Thunderbird SYBR qPCR Mix (Toyobo). Primer sequences are presented in  
825 Supplementary table 2.

826

### 827 **Primary culture of the telencephalon and treatment with pharmacological agents**

828 For monolayer culture, primary NPCs were isolated from the indicated regions of the  
829 telencephalon of ICR or of Ring1B KO or control mouse embryos. The dissected tissue  
830 was thus subjected to digestion with a papain-based solution (Sumitomo Bakelite), and  
831 the dissociated cells were cultured in dishes coated with poly-D-lysine (Sigma) and

832 containing Dulbecco's modified Eagle's medium (DMEM)–F12 (1:1, v/v)  
833 supplemented with B27 (Invitrogen) and recombinant human FGF2 (Invitrogen) at 20  
834 ng/ml. For explant culture, the dissected telencephalon of ICR mouse embryos was  
835 cultured in DMEM-F12 supplemented with B27 and recombinant human FGF2. After  
836 culture of cells or explant tissue for 6 h, half of the medium was removed and replaced  
837 with medium supplemented with B27, human FGF2, and either Smoothened agonist  
838 (SIGMA-ALDRICH), recombinant human BMP4 (R&D Systems) or CHIR-99201  
839 (Wako). Smoothened agonist was dissolved in dimethyl sulfoxide at a concentration of  
840 5 mM and was added to culture medium at a final concentration of 2  $\mu$ M. The  
841 recombinant BMP4 protein was dissolved at a concentration of 100  $\mu$ g/ml in sterile 4  
842 mM HCl containing 0.1% bovine serum albumin and was added to the culture medium  
843 at a final concentration of 50 ng/ml. CHIR-99201 was dissolved in dimethyl sulfoxide  
844 at a concentration of 1 mM and was added to culture medium at a final concentration of  
845 5  $\mu$ M. The cells or tissue were cultured for an additional 24 h and then frozen in liquid  
846 nitrogen before analysis.

847

#### 848 **Statistical analysis**

849 Data are presented as means  $\pm$  s.e.m. and were compared with two-tailed Student's  
850 paired or unpaired *t* test or by analysis of variance (ANOVA) followed by Bonferroni's  
851 multiple-comparison test.

852

853

854 **Reference**

855

856 Andrews, M.G., Kong, J., Novitch, B.G., Butler, S.J., 2019. New perspectives on the  
857 mechanisms establishing the dorsal-ventral axis of the spinal cord. *Curr. Top. Dev.*  
858 *Biol.* 132, 417–450. doi:10.1016/bs.ctdb.2018.12.010

859 Aoto, K., Shikata, Y., Imai, H., Matsumaru, D., Tokunaga, T., Shioda, S., Yamada, G.,  
860 Motoyama, J., 2009. Mouse Shh is required for prechordal plate maintenance  
861 during brain and craniofacial morphogenesis. *Developmental Biology* 327, 106–120.  
862 doi:10.1016/j.ydbio.2008.11.022

863 Backman, M., Machon, O., Mygland, L., van den Bout, C.J., Zhong, W., Taketo, M.M.,  
864 Krauss, S., 2005. Effects of canonical Wnt signaling on dorso-ventral specification  
865 of the mouse telencephalon. *Developmental Biology* 279, 155–168.  
866 doi:10.1016/j.ydbio.2004.12.010

867 Blaess, S., Szabó, N., Haddad-Tóvolli, R., Zhou, X., Alvarez-Bolado, G., 2014. Sonic  
868 hedgehog signaling in the development of the mouse hypothalamus. *Front*  
869 *Neuroanat* 8, 156. doi:10.3389/fnana.2014.00156

870 Briscoe, J., Small, S., 2015. Morphogen rules: design principles of gradient-mediated  
871 embryo patterning. *Development* 142, 3996–4009. doi:10.1242/dev.129452

872 Calés, C., Roman-Trufero, M., Pavón, L., Serrano, I., Melgar, T., Endoh, M., Pérez, C.,  
873 Koseki, H., Vidal, M., 2008. Inactivation of the polycomb group protein Ring1B  
874 unveils an antiproliferative role in hematopoietic cell expansion and cooperation  
875 with tumorigenesis associated with Ink4a deletion. *Molecular and Cellular Biology*  
876 28, 1018–1028. doi:10.1128/MCB.01136-07

877 Campbell, K., 2003. Dorsal-ventral patterning in the mammalian telencephalon. *Current*  
878 *Opinion in Neurobiology* 13, 50–56. doi:10.1016/S0959-4388(03)00009-6

879 Casarosa, S., Fode, C., Guillemot, F., 1999. Mash1 regulates neurogenesis in the ventral  
880 telencephalon. *Development* 126, 525–534.

881 Chambeyron, S., Da Silva, N.R., Lawson, K.A., Bickmore, W.A., 2005. Nuclear  
882 re-organisation of the Hoxb complex during mouse embryonic development.  
883 *Development* 132, 2215–2223. doi:10.1242/dev.01813

884 Cheng, X., Hsu, C.-M., Currele, D.S., Hu, J.S., Barkovich, A.J., Monuki, E.S., 2006.  
885 Central roles of the roof plate in telencephalic development and holoprosencephaly.  
886 *Journal of Neuroscience* 26, 7640–7649. doi:10.1523/JNEUROSCI.0714-06.2006

887 Chiang, C., Litingtung, Y., Lee, E., Young, K.E., Corden, J.L., Westphal, H., Beachy,  
888 P.A., 1996. Cyclopia and defective axial patterning in mice lacking Sonic hedgehog  
889 gene function. *Nature* 383, 407–413. doi:10.1038/383407a0

- 890 Chou, S.-J., Tole, S., 2019. Lhx2, an evolutionarily conserved, multifunctional regulator  
891 of forebrain development. *Brain Res.* 1705, 1–14.  
892 doi:10.1016/j.brainres.2018.02.046
- 893 Corbin, J.G., Rutlin, M., Gaiano, N., Fishell, G., 2003. Combinatorial function of the  
894 homeodomain proteins Nkx2.1 and Gsh2 in ventral telencephalic patterning.  
895 *Development* 130, 4895–4906. doi:10.1242/dev.00717
- 896 Currle, D.S., Cheng, X., Hsu, C.-M., Monuki, E.S., 2005. Direct and indirect roles of  
897 CNS dorsal midline cells in choroid plexus epithelia formation. *Development* 132,  
898 3549–3559. doi:10.1242/dev.01915
- 899 de Napoles, M., Mermoud, J.E., Wakao, R., Tang, Y.A., Endoh, M., Appanah, R.,  
900 Nesterova, T.B., Silva, J., Otte, A.P., Vidal, M., Koseki, H., Brockdorff, N., 2004.  
901 Polycomb group proteins Ring1A/B link ubiquitylation of histone H2A to heritable  
902 gene silencing and X inactivation. *Developmental Cell* 7, 663–676.  
903 doi:10.1016/j.devcel.2004.10.005
- 904 Di Croce, L., Helin, K., 2013. Transcriptional regulation by Polycomb group proteins.  
905 *Nature Structural & Molecular Biology* 20, 1147–1155.  
906 doi:10.1038/nsmb.2669
- 907 Endoh, M., Endo, T.A., Endoh, T., Fujimura, Y.-I., Ohara, O., Toyoda, T., Otte, A.P.,  
908 Okano, M., Brockdorff, N., Vidal, M., Koseki, H., 2008. Polycomb group proteins  
909 Ring1A/B are functionally linked to the core transcriptional regulatory circuitry to  
910 maintain ES cell identity. *Development* 135, 1513–1524. doi:10.1242/dev.014340
- 911 Ericson, J., Muhr, J., Placzek, M., Lints, T., Jessell, T.M., Edlund, T., 1995. Sonic  
912 hedgehog induces the differentiation of ventral forebrain neurons: a common signal  
913 for ventral patterning within the neural tube. *Cell* 81, 747–756.
- 914 Fernandes, M., Gutin, G., Alcorn, H., McConnell, S.K., Hebert, J.M., 2007. Mutations  
915 in the BMP pathway in mice support the existence of two molecular classes of  
916 holoprosencephaly. *Development* 134, 3789–3794. doi:10.1242/dev.004325
- 917 Fode, C., Ma, Q., Casarosa, S., Ang, S.L., Anderson, D.J., Guillemot, F., 2000. A role  
918 for neural determination genes in specifying the dorsoventral identity of  
919 telencephalic neurons. *Genes & Development* 14, 67–80.
- 920 Fuccillo, M., Rallu, M., McMahon, A.P., Fishell, G., 2004. Temporal requirement for  
921 hedgehog signaling in ventral telencephalic patterning. *Development* 131, 5031–  
922 5040. doi:10.1242/dev.01349
- 923 Furuta, Y., Piston, D.W., Hogan, B.L., 1997. Bone morphogenetic proteins (BMPs) as  
924 regulators of dorsal forebrain development. *Development* 124, 2203–2212.
- 925 Galceran, J., Miyashita-Lin, E.M., Devaney, E., Rubenstein, J.L., Grosschedl, R., 2000.

- 926 Hippocampus development and generation of dentate gyrus granule cells is  
927 regulated by LEF1. *Development* 127, 469–482.
- 928 Golden, J.A., Bracilovic, A., McFadden, K.A., Beesley, J.S., Rubenstein, J.L., Grinspan,  
929 J.B., 1999. Ectopic bone morphogenetic proteins 5 and 4 in the chicken forebrain  
930 lead to cyclopia and holoprosencephaly. *Proc. Natl. Acad. Sci. U.S.A.* 96, 2439–  
931 2444. doi:10.1073/pnas.96.5.2439
- 932 Golden, M.G., Dasen, J.S., 2012. Polycomb repressive complex 1 activities determine  
933 the columnar organization of motor neurons. *Genes & Development* 26, 2236–2250.  
934 doi:10.1101/gad.199133.112
- 935 Gorski, J.A., Talley, T., Qiu, M., Puelles, L., Rubenstein, J.L.R., Jones, K.R., 2002.  
936 Cortical excitatory neurons and glia, but not GABAergic neurons, are produced in  
937 the *Emx1*-expressing lineage. *Journal of Neuroscience* 22, 6309–6314.
- 938 Gupta, S., Sen, J., 2016. Roof plate mediated morphogenesis of the forebrain: New  
939 players join the game. *Developmental Biology* 413, 145–152.  
940 doi:10.1016/j.ydbio.2016.03.019
- 941 Gutin, G., Fernandes, M., Palazzolo, L., Paek, H., Yu, K., Ornitz, D.M., McConnell,  
942 S.K., Hebert, J.M., 2006. FGF signalling generates ventral telencephalic cells  
943 independently of SHH. *Development* 133, 2937–2946. doi:10.1242/dev.02465
- 944 Harrison-Uy, S.J., Pleasure, S.J., 2012. Wnt signaling and forebrain development. *Cold*  
945 *Spring Harbor Perspectives in Biology* 4, a008094.  
946 doi:10.1101/cshperspect.a008094
- 947 Hasenpusch-Theil, K., Magnani, D., Amaniti, E.-M., Han, L., Armstrong, D., Theil, T.,  
948 2012. Transcriptional analysis of *Gli3* mutants identifies Wnt target genes in the  
949 developing hippocampus. *Cerebral Cortex* 22, 2878–2893.  
950 doi:10.1093/cercor/bhr365
- 951 Hayhurst, M., Gore, B.B., Tessier-Lavigne, M., McConnell, S.K., 2008. Ongoing sonic  
952 hedgehog signaling is required for dorsal midline formation in the developing  
953 forebrain. *Dev Neurobiol* 68, 83–100. doi:10.1002/dneu.20576
- 954 Hebert, J.M., Fishell, G., 2008. The genetics of early telencephalon patterning: some  
955 assembly required. *Nat Rev Neurosci* 9, 678–685. doi:10.1038/nrn2463
- 956 Hebert, J.M., Mishina, Y., McConnell, S.K., 2002. BMP signaling is required locally to  
957 pattern the dorsal telencephalic midline. *Neuron* 35, 1029–1041.
- 958 Hirabayashi, Y., Suzuki, N., Tsuboi, M., Endo, T.A., Toyoda, T., Shinga, J., Koseki, H.,  
959 Vidal, M., Gotoh, Y., 2009. Polycomb limits the neurogenic competence of neural  
960 precursor cells to promote astrogenic fate transition. *Neuron* 63, 600–613.  
961 doi:10.1016/j.neuron.2009.08.021

- 962 Hsu, L.C.-L., Nam, S., Cui, Y., Chang, C.-P., Wang, C.-F., Kuo, H.-C., Touboul, J.D.,  
963 Chou, S.-J., 2015. Lhx2 regulates the timing of  $\beta$ -catenin-dependent cortical  
964 neurogenesis. *Proceedings of the National Academy of Sciences* 112, 12199–12204.  
965 doi:10.1073/pnas.1507145112
- 966 Huang, X., Litingtung, Y., Chiang, C., 2007. Ectopic sonic hedgehog signaling impairs  
967 telencephalic dorsal midline development: implication for human  
968 holoprosencephaly. *Human Molecular Genetics* 16, 1454–1468.  
969 doi:10.1093/hmg/ddm096
- 970 Jeong, Y., Epstein, D.J., 2003. Distinct regulators of Shh transcription in the floor plate  
971 and notochord indicate separate origins for these tissues in the mouse node.  
972 *Development* 130, 3891–3902. doi:10.1242/dev.00590
- 973 Kawaguchi, D., Sahara, S., Zembrzycki, A., O'Leary, D.D.M., 2016. Generation and  
974 analysis of an improved Foxg1-IRES-Cre driver mouse line. *Developmental*  
975 *Biology* 412, 139–147. doi:10.1016/j.ydbio.2016.02.011
- 976 Kroll, T.T., O'Leary, D.D.M., 2005. Ventralized dorsal telencephalic progenitors in  
977 Pax6 mutant mice generate GABA interneurons of a lateral ganglionic eminence  
978 fate. *Proc. Natl. Acad. Sci. U.S.A.* 102, 7374–7379. doi:10.1073/pnas.0500819102
- 979 Kuschel, S., R  ther, U., Theil, T., 2003. A disrupted balance between Bmp/Wnt and Fgf  
980 signaling underlies the ventralization of the Gli3 mutant telencephalon.  
981 *Developmental Biology* 260, 484–495. doi:10.1016/S0012-1606(03)00252-5
- 982 Lu, Q.R., Yuk, D., Alberta, J.A., Zhu, Z., Pawlitzky, I., Chan, J., McMahon, A.P., Stiles,  
983 C.D., Rowitch, D.H., 2000. Sonic hedgehog--regulated oligodendrocyte lineage  
984 genes encoding bHLH proteins in the mammalian central nervous system. *Neuron*  
985 25, 317–329.
- 986 Lupo, G., Harris, W.A., Lewis, K.E., 2006. Mechanisms of ventral patterning in the  
987 vertebrate nervous system. *Nat Rev Neurosci* 7, 103–114. doi:10.1038/nrn1843
- 988 Maeda, R.K., Karch, F., 2009. The bithorax complex of *Drosophila* an exceptional Hox  
989 cluster. *Curr. Top. Dev. Biol.* 88, 1–33. doi:10.1016/S0070-2153(09)88001-0
- 990 Mathieu, J., Barth, A., Rosa, F.M., Wilson, S.W., Peyri  ras, N., 2002. Distinct and  
991 cooperative roles for Nodal and Hedgehog signals during hypothalamic  
992 development. *Development* 129, 3055–3065.
- 993 McCarthy, D.J., Chen, Y., Smyth, G.K., 2012. Differential expression analysis of  
994 multifactor RNA-Seq experiments with respect to biological variation. *Nucleic*  
995 *Acids Research* 40, 4288–4297. doi:10.1093/nar/gks042
- 996 Montavon, T., Soshnikova, N., 2014. Hox gene regulation and timing in embryogenesis.  
997 *Semin. Cell Dev. Biol.* 34, 76–84. doi:10.1016/j.semcd.2014.06.005



- 998 Monuki, E.S., Porter, F.D., Walsh, C.A., 2001. Patterning of the dorsal telencephalon  
999 and cerebral cortex by a roof plate-Lhx2 pathway. *Neuron* 32, 591–604.
- 1000 Morimoto-Suzuki, N., Hirabayashi, Y., Tyssowski, K., Shinga, J., Vidal, M., Koseki, H.,  
1001 Gotoh, Y., 2014. The polycomb component Ring1B regulates the timed termination  
1002 of subcerebral projection neuron production during mouse neocortical development.  
1003 *Development* 141, 4343–4353. doi:10.1242/dev.112276
- 1004 Ohkubo, Y., Chiang, C., Rubenstein, J.L.R., 2002. Coordinate regulation and  
1005 synergistic actions of BMP4, SHH and FGF8 in the rostral prosencephalon regulate  
1006 morphogenesis of the telencephalic and optic vesicles. *Neuroscience* 111, 1–17.
- 1007 Panchision, D.M., Pickel, J.M., Studer, L., Lee, S.H., Turner, P.A., Hazel, T.G., McKay,  
1008 R.D., 2001. Sequential actions of BMP receptors control neural precursor cell  
1009 production and fate. *Genes & Development* 15, 2094–2110.  
1010 doi:10.1101/gad.894701
- 1011 Pereira, J.D., Sansom, S.N., Smith, J., Dobenecker, M.-W., Tarakhovskiy, A., Livesey,  
1012 F.J., 2010. Ezh2, the histone methyltransferase of PRC2, regulates the balance  
1013 between self-renewal and differentiation in the cerebral cortex. *Proceedings of the*  
1014 *National Academy of Sciences* 107, 15957–15962. doi:10.1073/pnas.1002530107
- 1015 Rallu, M., Machold, R., Gaiano, N., Corbin, J.G., McMahon, A.P., Fishell, G., 2002.  
1016 Dorsoventral patterning is established in the telencephalon of mutants lacking both  
1017 Gli3 and Hedgehog signaling. *Development* 129, 4963–4974.
- 1018 Rash, B.G., Grove, E.A., 2007. Patterning the dorsal telencephalon: a role for sonic  
1019 hedgehog? *Journal of Neuroscience* 27, 11595–11603.  
1020 doi:10.1523/JNEUROSCI.3204-07.2007
- 1021 Robinson, M.D., McCarthy, D.J., Smyth, G.K., 2010. edgeR: a Bioconductor package  
1022 for differential expression analysis of digital gene expression data. *Bioinformatics*  
1023 26, 139–140. doi:10.1093/bioinformatics/btp616
- 1024 Rohr, K.B., Barth, K.A., Varga, Z.M., Wilson, S.W., 2001. The nodal pathway acts  
1025 upstream of hedgehog signaling to specify ventral telencephalic identity. *Neuron* 29,  
1026 341–351.
- 1027 Roy, A., Gonzalez-Gomez, M., Pierani, A., Meyer, G., Tole, S., 2014. Lhx2 regulates  
1028 the development of the forebrain hem system. *Cerebral Cortex* 24, 1361–1372.  
1029 doi:10.1093/cercor/bhs421
- 1030 Sasagawa, Y., Nikaido, I., Hayashi, T., Danno, H., Uno, K.D., Imai, T., Ueda, H.R.,  
1031 2013. Quartz-Seq: a highly reproducible and sensitive single-cell RNA sequencing  
1032 method, reveals non-genetic gene-expression heterogeneity. *Genome Biology* 14,  
1033 R31. doi:10.1186/gb-2013-14-4-r31

- 1034 Shan, Y., Liang, Z., Xing, Q., Zhang, T., Wang, B., Tian, S., Huang, W., Zhang, Y.,  
1035 Yao, J., Zhu, Y., Huang, K., Liu, Y., Wang, X., Chen, Q., Zhang, J., Shang, B., Li,  
1036 S., Shi, X., Liao, B., Zhang, C., Lai, K., Zhong, X., Shu, X., Wang, J., Yao, H.,  
1037 Chen, J., Pei, D., Pan, G., 2017. PRC2 specifies ectoderm lineages and maintains  
1038 pluripotency in primed but not naïve ESCs. *Nature Communications* 8, 672.  
1039 doi:10.1038/s41467-017-00668-4
- 1040 Shimamura, K., Hartigan, D.J., Martinez, S., Puellas, L., Rubenstein, J.L., 1995.  
1041 Longitudinal organization of the anterior neural plate and neural tube. *Development*  
1042 121, 3923–3933.
- 1043 Shimamura, K., Rubenstein, J.L., 1997. Inductive interactions direct early  
1044 regionalization of the mouse forebrain. *Development* 124, 2709–2718.
- 1045 Shinya, M., Koshida, S., Sawada, A., Kuroiwa, A., Takeda, H., 2001. Fgf signalling  
1046 through MAPK cascade is required for development of the subpallial telencephalon  
1047 in zebrafish embryos. *Development* 128, 4153–4164.
- 1048 Simeone, A., Acampora, D., Gulisano, M., Stornaiuolo, A., Boncinelli, E., 1992. Nested  
1049 expression domains of four homeobox genes in developing rostral brain. *Nature* 358,  
1050 687–690. doi:10.1038/358687a0
- 1051 Simon, J.A., Kingston, R.E., 2013. Occupying chromatin: Polycomb mechanisms for  
1052 getting to genomic targets, stopping transcriptional traffic, and staying put.  
1053 *Molecular Cell* 49, 808–824. doi:10.1016/j.molcel.2013.02.013
- 1054 Sparmann, A., Xie, Y., Verhoeven, E., Vermeulen, M., Lancini, C., Gargiulo, G.,  
1055 Hulsman, D., Mann, M., Knoblich, J.A., van Lohuizen, M., 2013. The  
1056 chromodomain helicase Chd4 is required for Polycomb-mediated inhibition of  
1057 astroglial differentiation. *The EMBO Journal* 32, 1598–1612.  
1058 doi:10.1038/emboj.2013.93
- 1059 Storm, E.E., Garel, S., Borello, U., Hebert, J.M., Martinez, S., McConnell, S.K., Martin,  
1060 G.R., Rubenstein, J.L.R., 2006. Dose-dependent functions of Fgf8 in regulating  
1061 telencephalic patterning centers. *Development* 133, 1831–1844.  
1062 doi:10.1242/dev.02324
- 1063 Storm, E.E., Rubenstein, J.L.R., Martin, G.R., 2003. Dosage of Fgf8 determines  
1064 whether cell survival is positively or negatively regulated in the developing  
1065 forebrain. *Proc. Natl. Acad. Sci. U.S.A.* 100, 1757–1762.  
1066 doi:10.1073/pnas.0337736100
- 1067 Sur, M., Rubenstein, J.L.R., 2005. Patterning and plasticity of the cerebral cortex.  
1068 *Science* 310, 805–810. doi:10.1126/science.1112070
- 1069 Sussel, L., Marin, O., Kimura, S., Rubenstein, J.L., 1999. Loss of Nkx2.1 homeobox

- 1070 gene function results in a ventral to dorsal molecular respecification within the  
1071 basal telencephalon: evidence for a transformation of the pallidum into the striatum.  
1072 *Development* 126, 3359–3370.
- 1073 Takashima, Y., Era, T., Nakao, K., Kondo, S., Kasuga, M., Smith, A.G., Nishikawa,  
1074 S.-I., 2007. Neuroepithelial cells supply an initial transient wave of MSC  
1075 differentiation. *Cell* 129, 1377–1388. doi:10.1016/j.cell.2007.04.028
- 1076 Takebayashi, H., Yoshida, S., Sugimori, M., Kosako, H., Kominami, R., Nakafuku, M.,  
1077 Nabeshima, Y., 2000. Dynamic expression of basic helix-loop-helix Olig family  
1078 members: implication of Olig2 in neuron and oligodendrocyte differentiation and  
1079 identification of a new member, Olig3. *Mech. Dev.* 99, 143–148.
- 1080 Toresson, H., Potter, S.S., Campbell, K., 2000. Genetic control of dorsal-ventral identity  
1081 in the telencephalon: opposing roles for Pax6 and Gsh2. *Development* 127, 4361–  
1082 4371.
- 1083 Tsuboi, M., Kishi, Y., Yokozeki, W., Koseki, H., Hirabayashi, Y., Gotoh, Y., 2018.  
1084 Ubiquitination-Independent Repression of PRC1 Targets during Neuronal Fate  
1085 Restriction in the Developing Mouse Neocortex. *Developmental Cell* 47, 758–  
1086 772.e5. doi:10.1016/j.devcel.2018.11.018
- 1087 Wang, H., Wang, L., Erdjument-Bromage, H., Vidal, M., Tempst, P., Jones, R.S.,  
1088 Zhang, Y., 2004. Role of histone H2A ubiquitination in Polycomb silencing. *Nature*  
1089 431, 873–878. doi:10.1038/nature02985
- 1090 Wigle, J.T., Eisenstat, D.D., 2008. Homeobox genes in vertebrate forebrain  
1091 development and disease. *Clin. Genet.* 73, 212–226.  
1092 doi:10.1111/j.1399-0004.2008.00967.x
- 1093 Wilson, P.A., Hemmati-Brivanlou, A., 1995. Induction of epidermis and inhibition of  
1094 neural fate by Bmp-4. *Nature* 376, 331–333. doi:10.1038/376331a0
- 1095 Zemke, M., Draganova, K., Klug, A., Schöler, A., Zurkirchen, L., Gay, M.H.-P., Cheng,  
1096 P., Koseki, H., Valenta, T., Schübeler, D., Basler, K., Sommer, L., 2015. Loss of  
1097 Ezh2 promotes a midbrain-to-forebrain identity switch by direct gene derepression  
1098 and Wnt-dependent regulation. *BMC Biol* 13, 103. doi:10.1186/s12915-015-0210-9  
1099

**Figure 1**

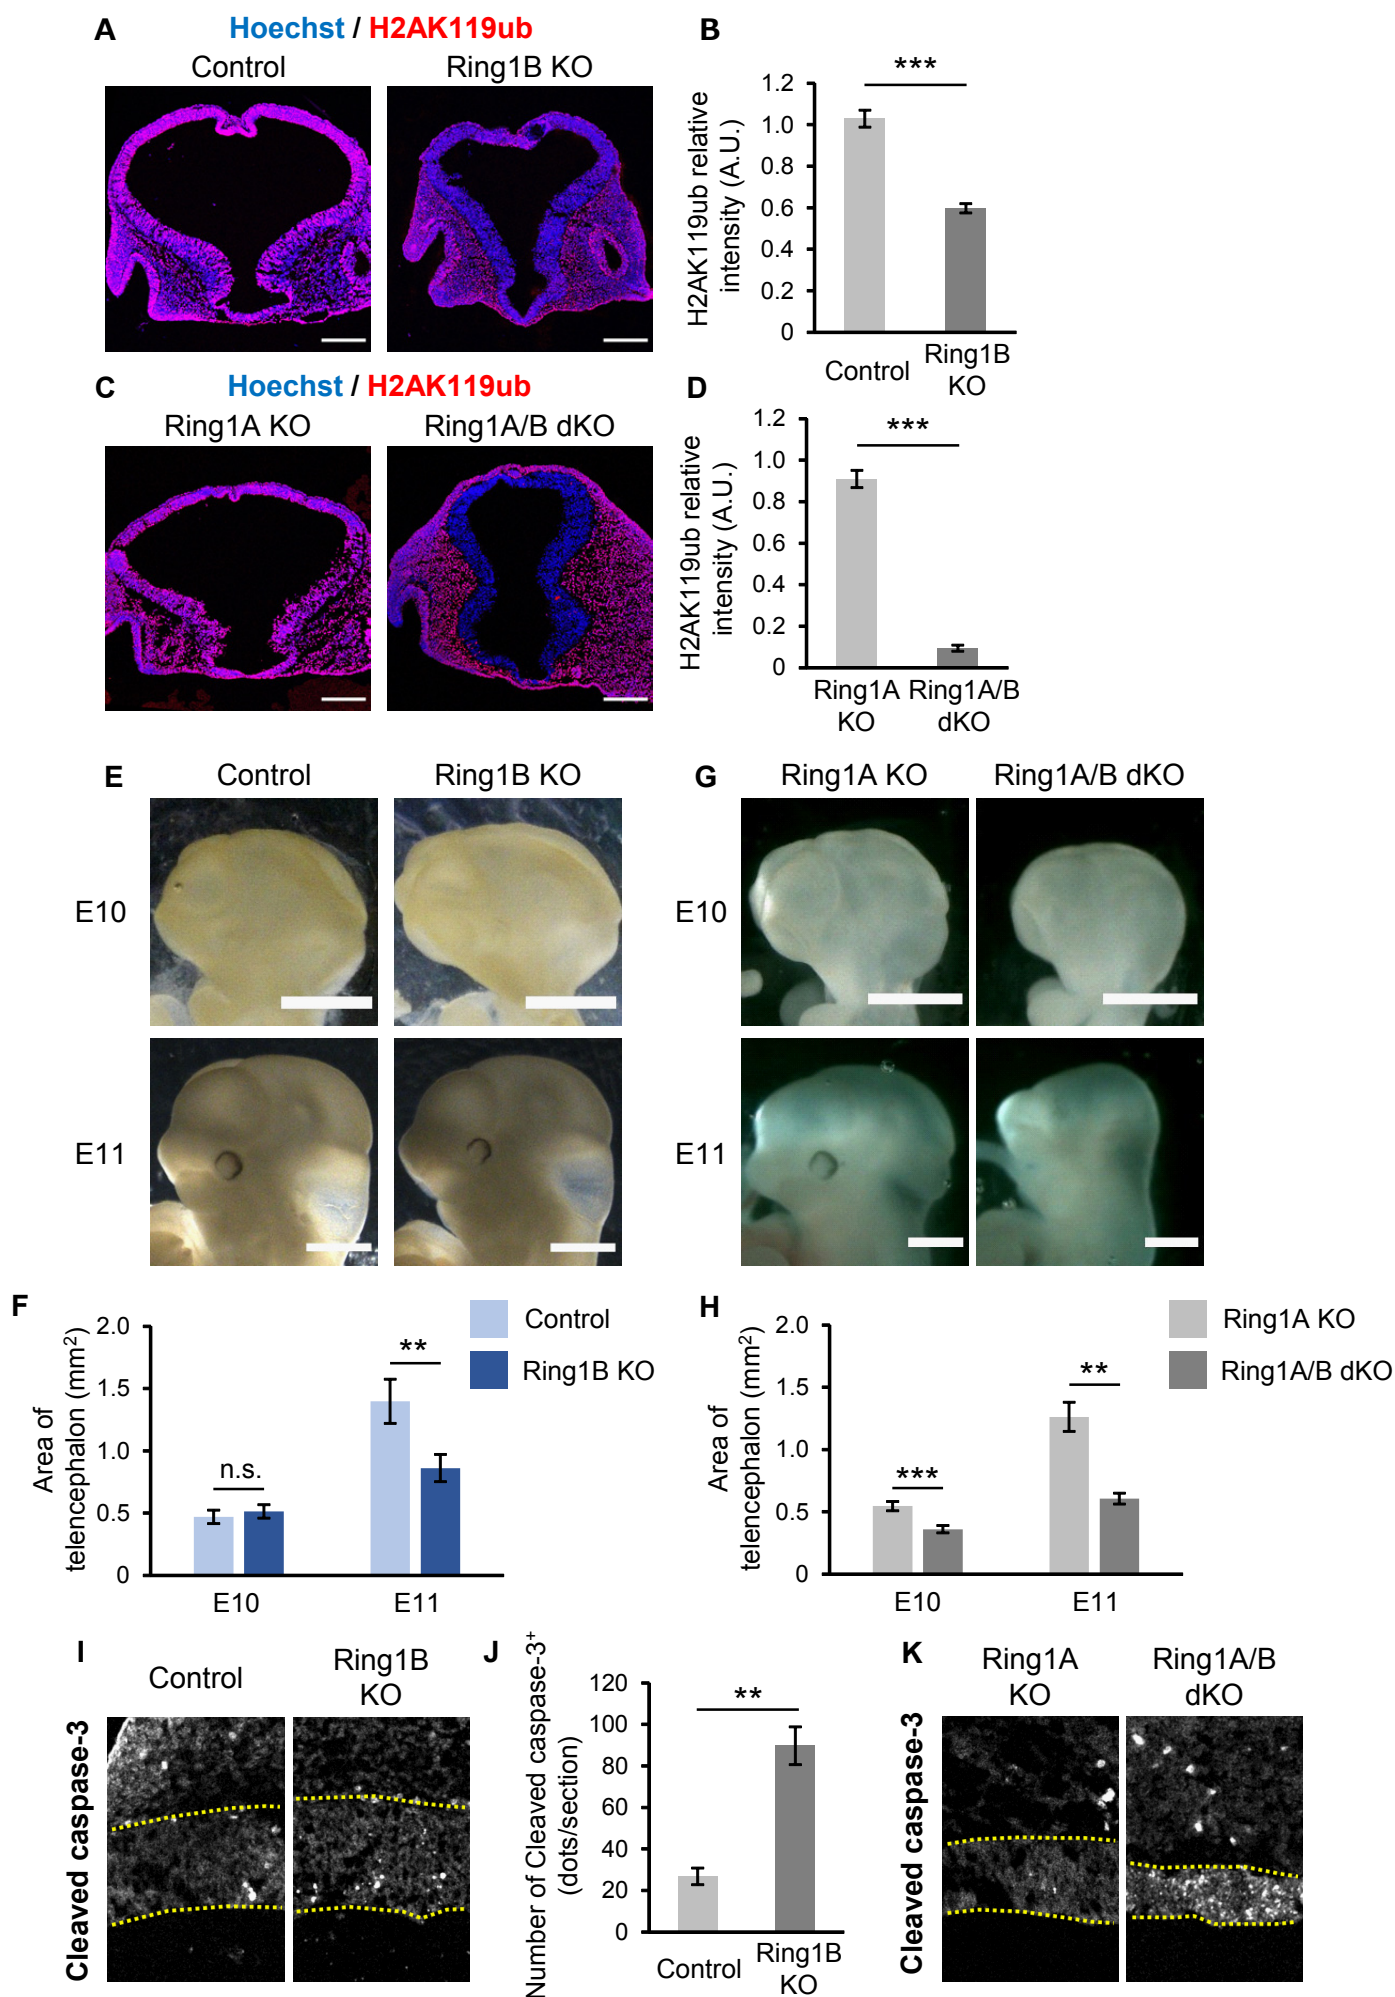

**Figure 2**

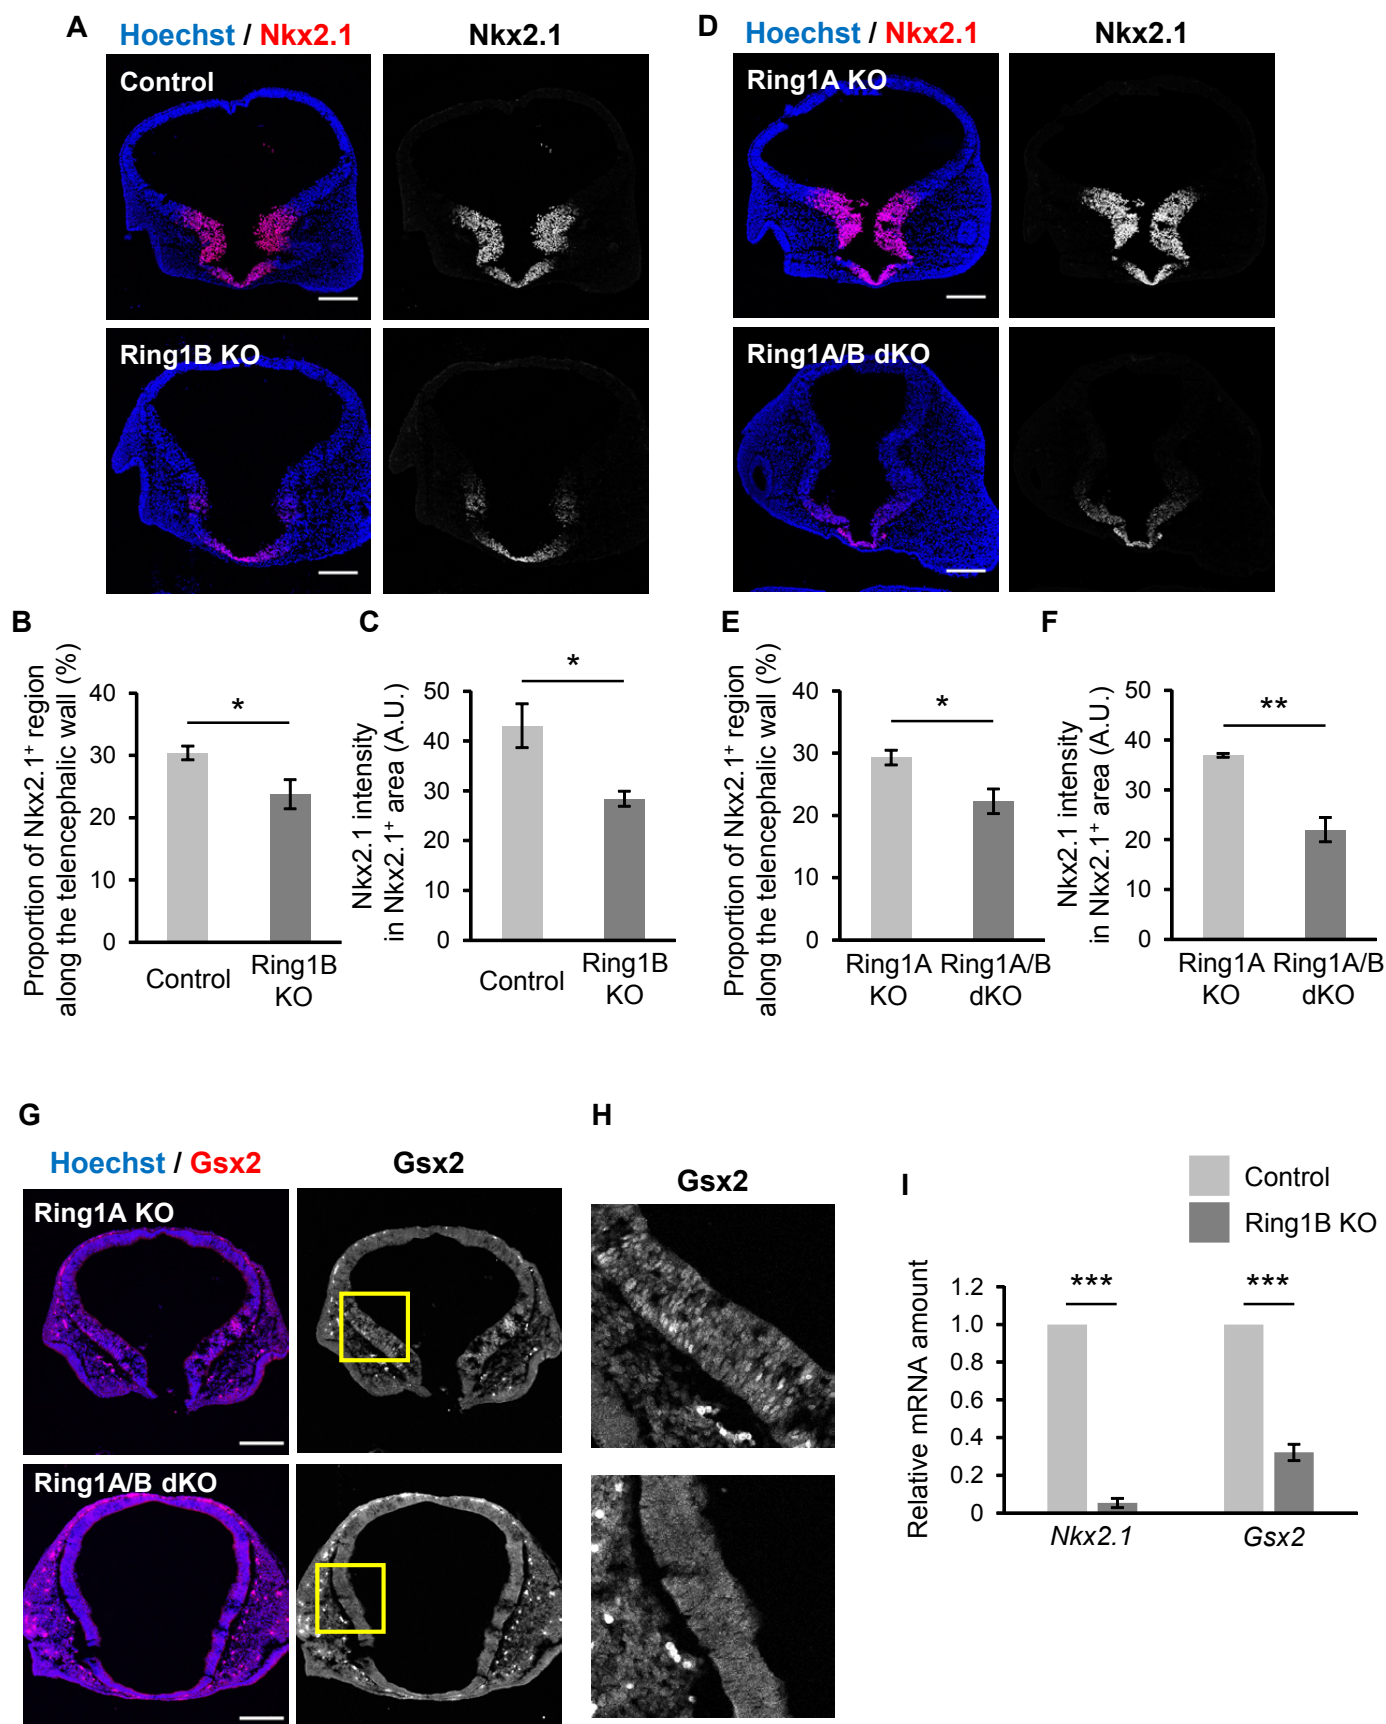

Figure 3

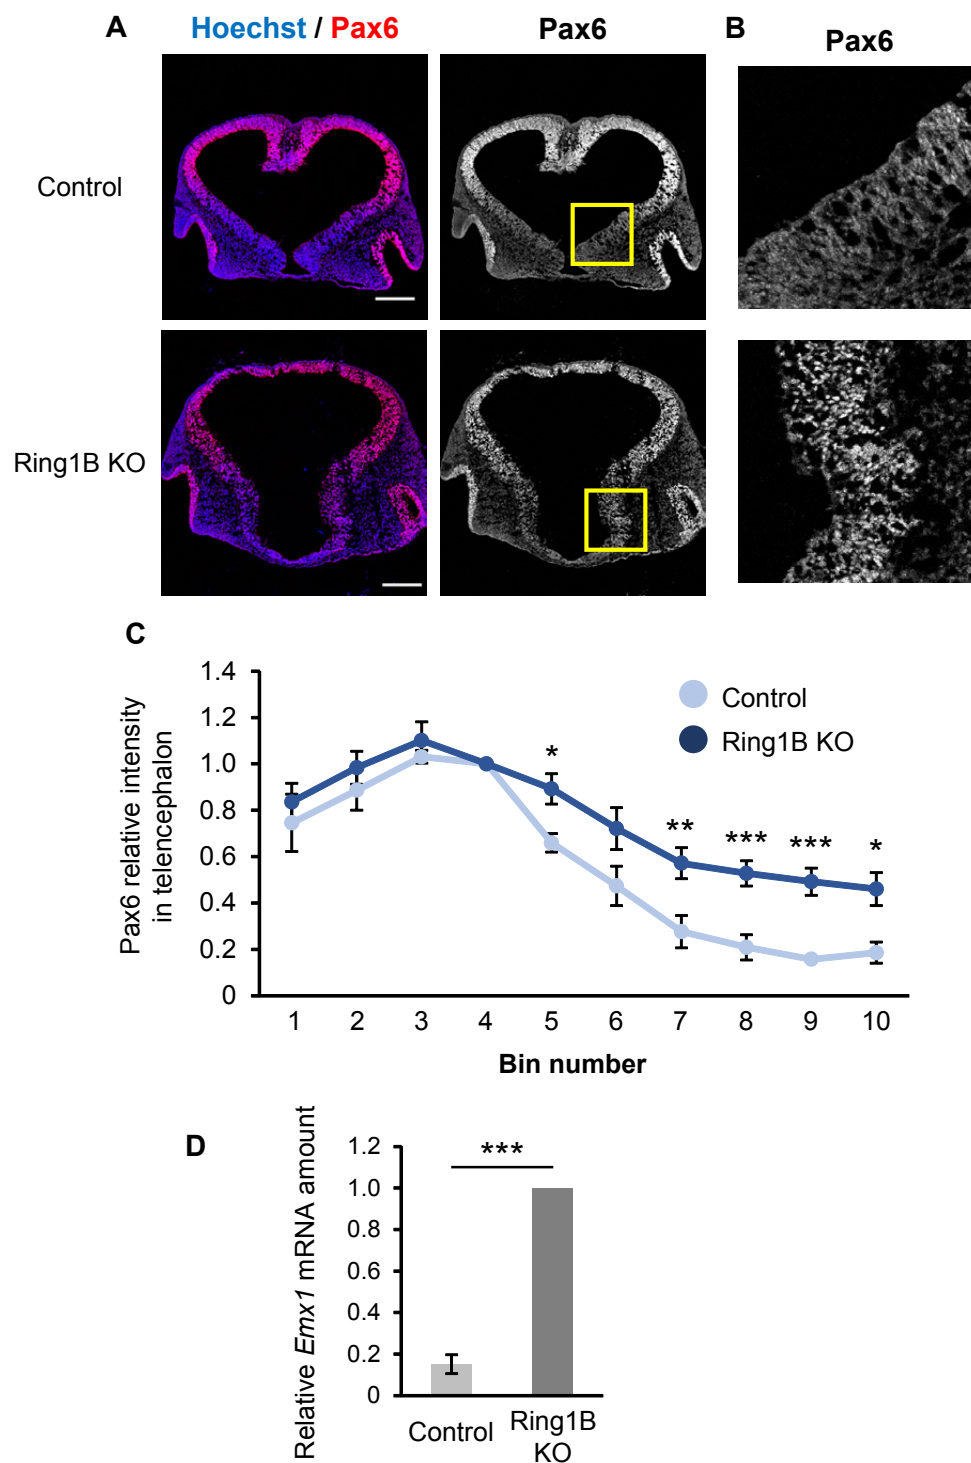

**Figure 4**

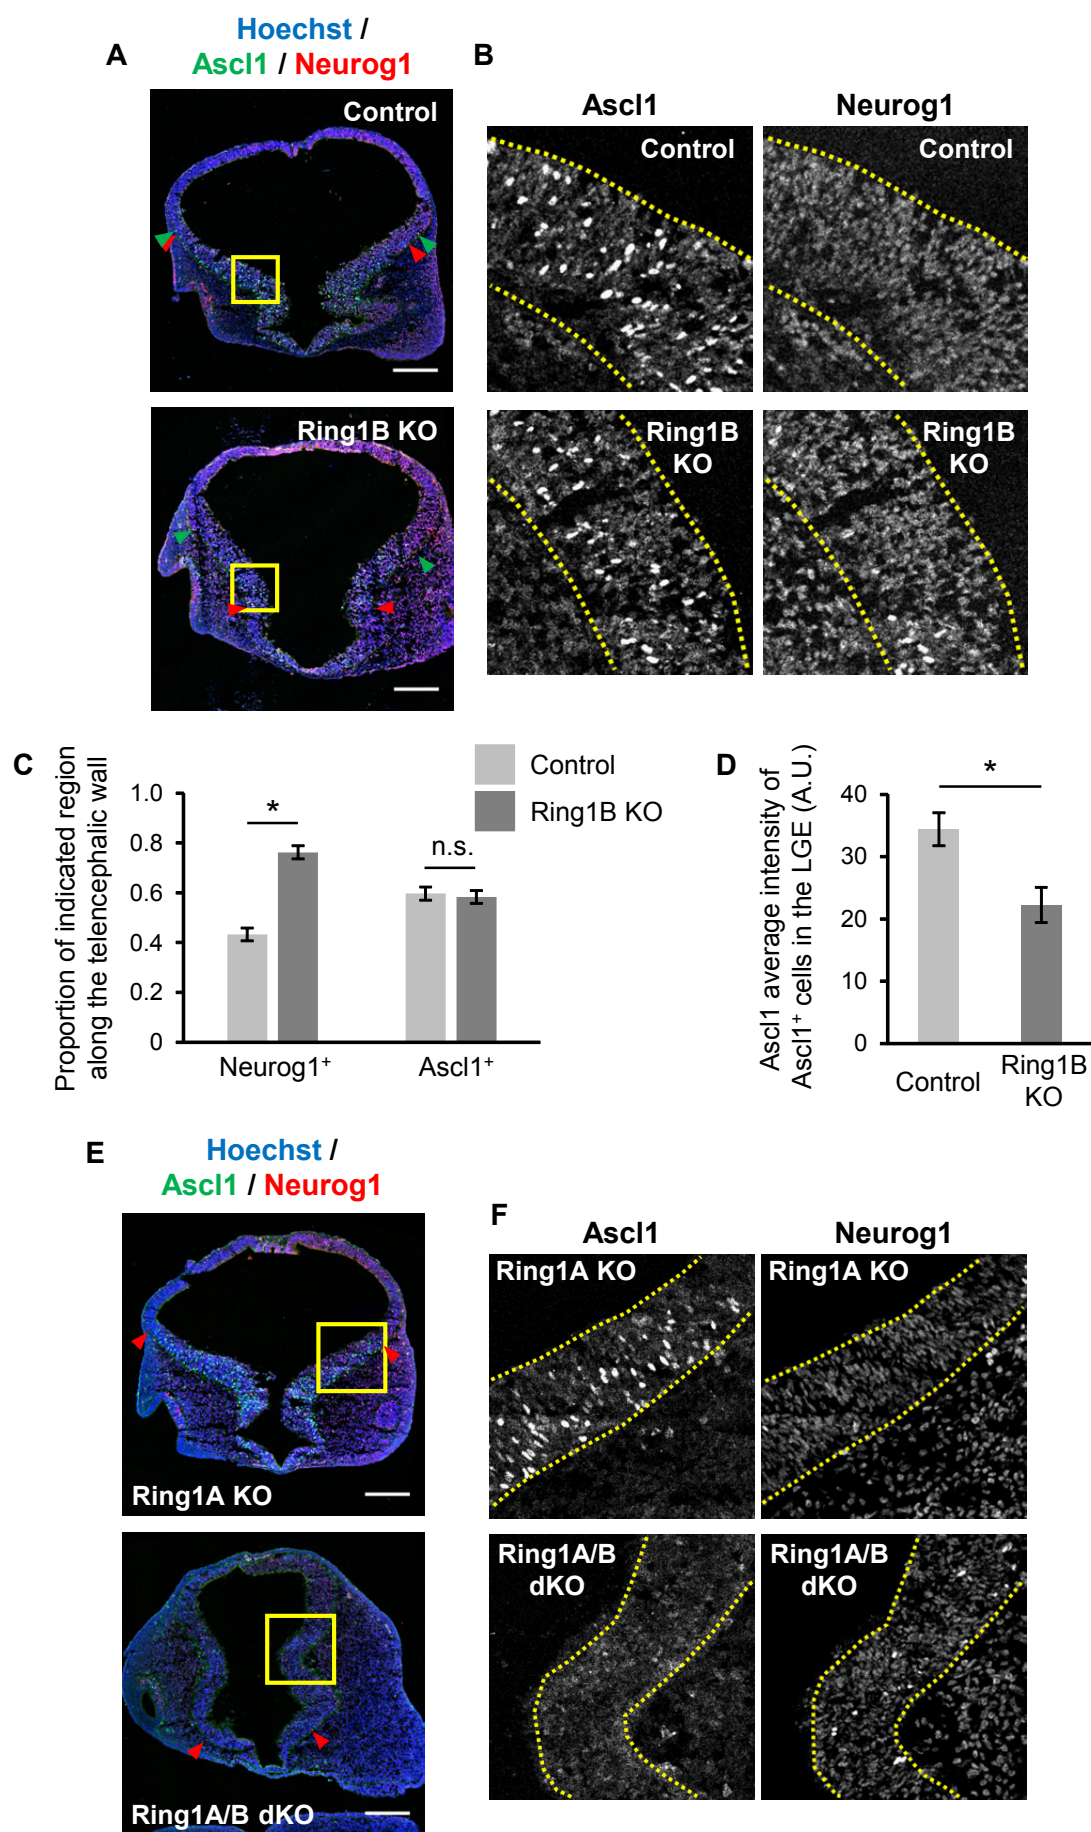

**Figure 5**

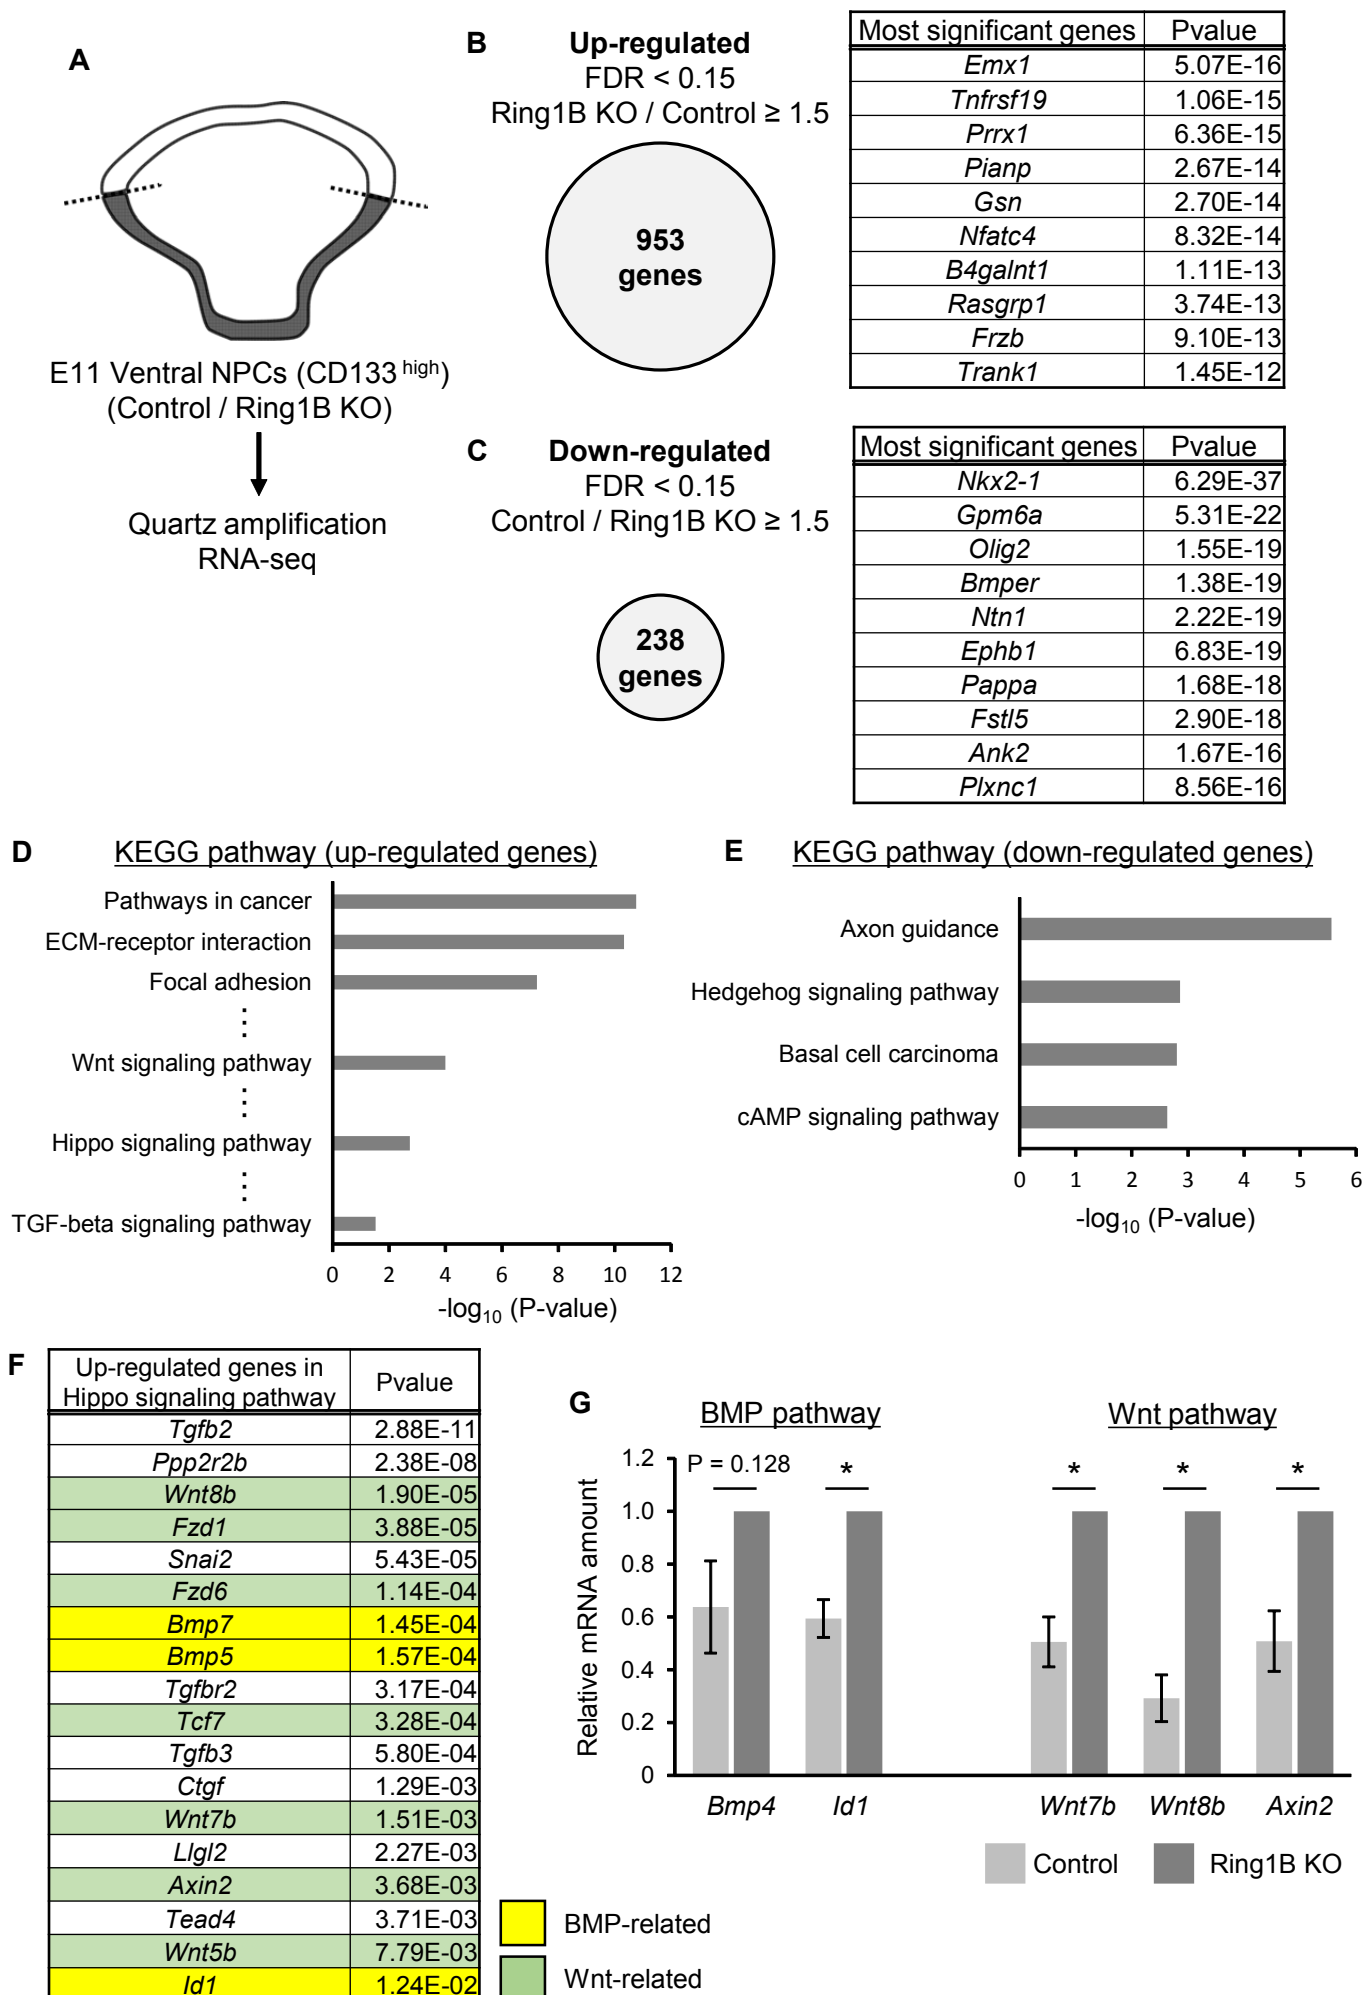



**Figure 6**

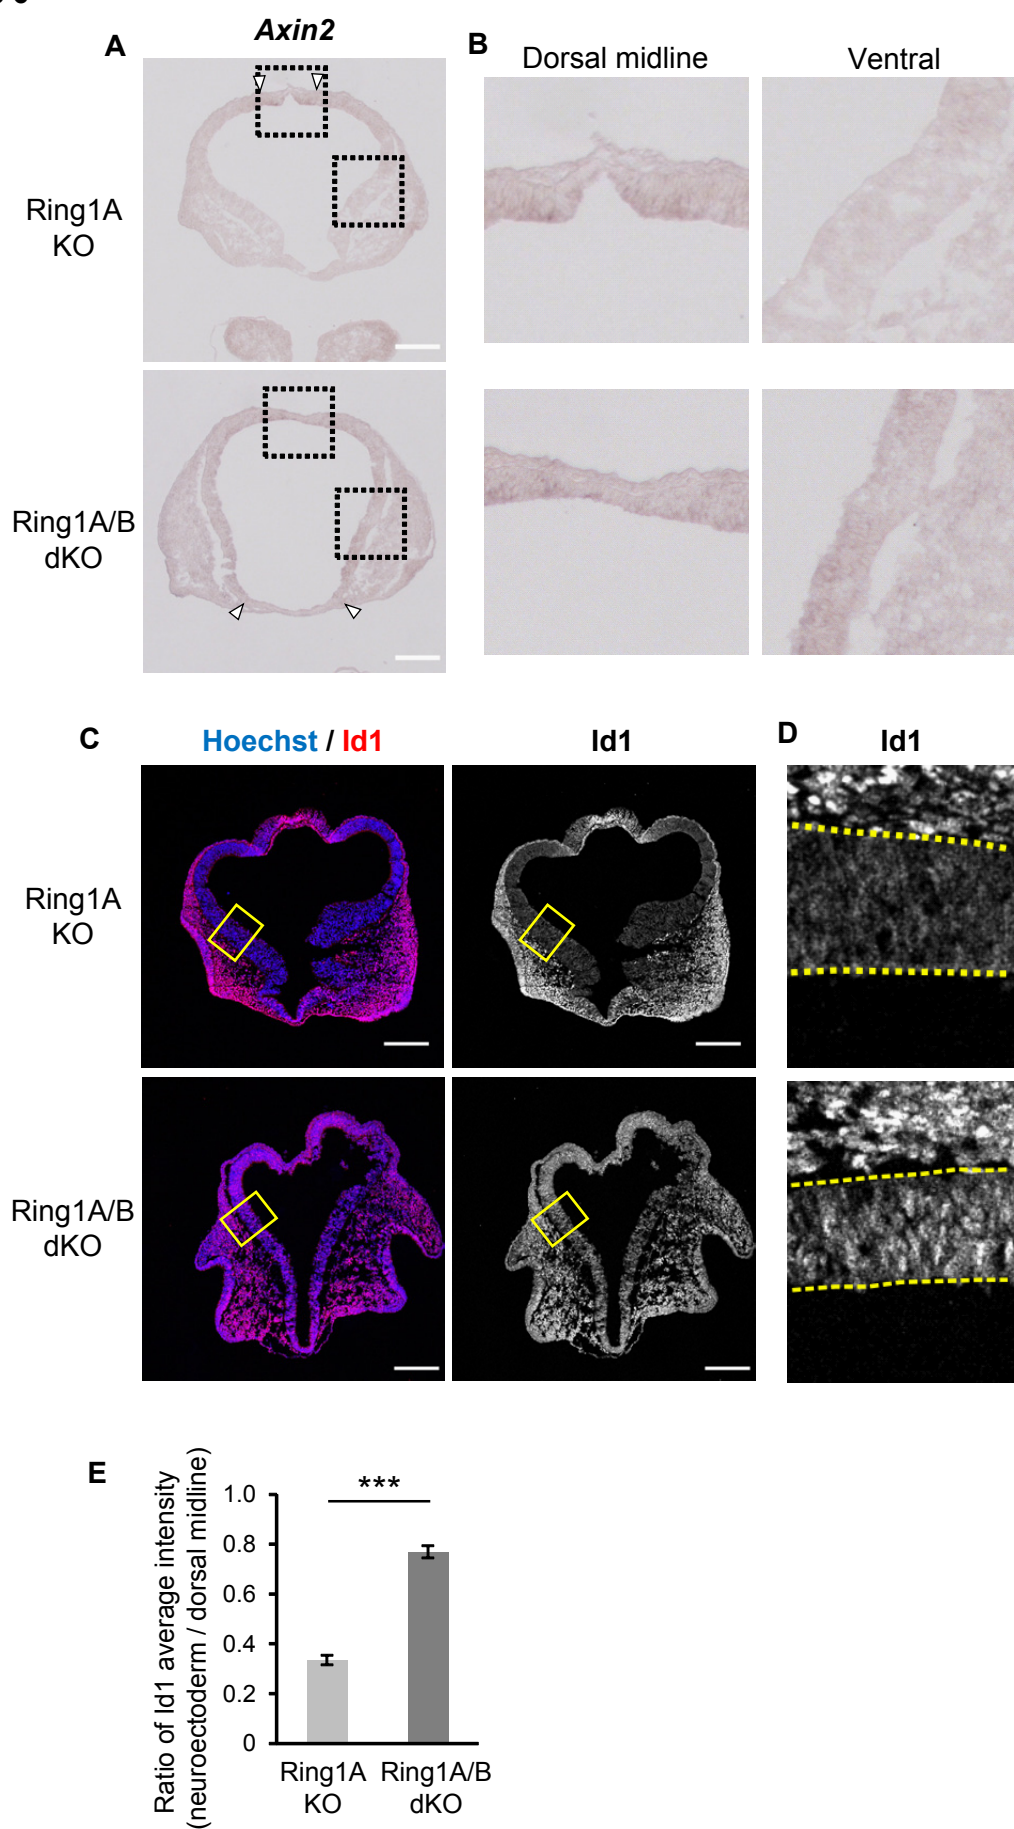

**Figure 7**

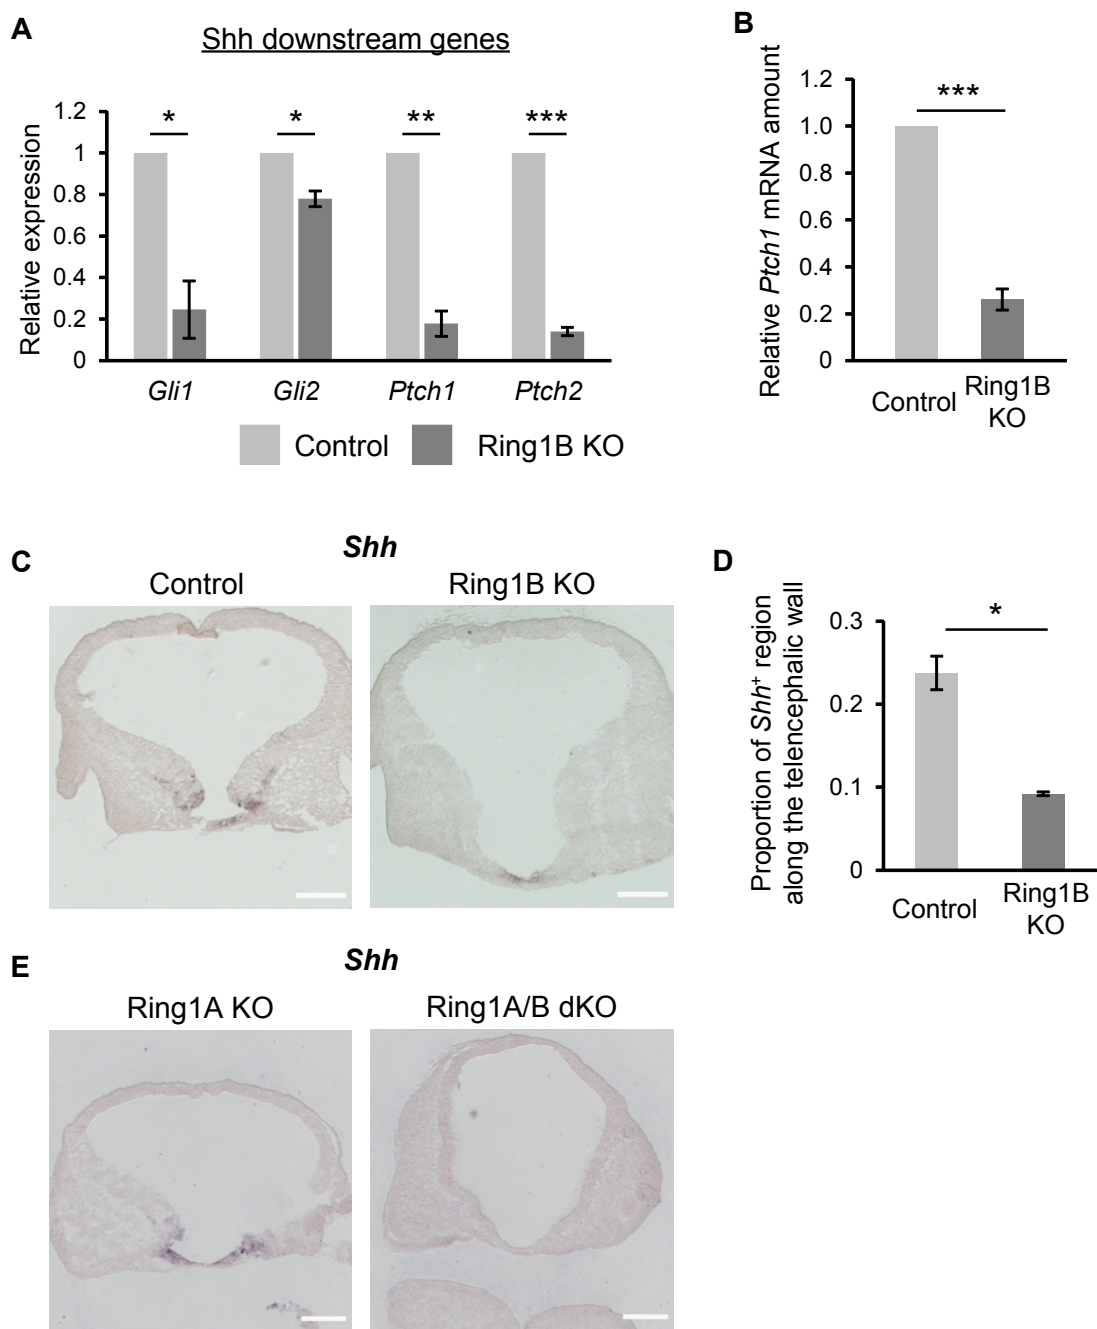

**Figure 8**

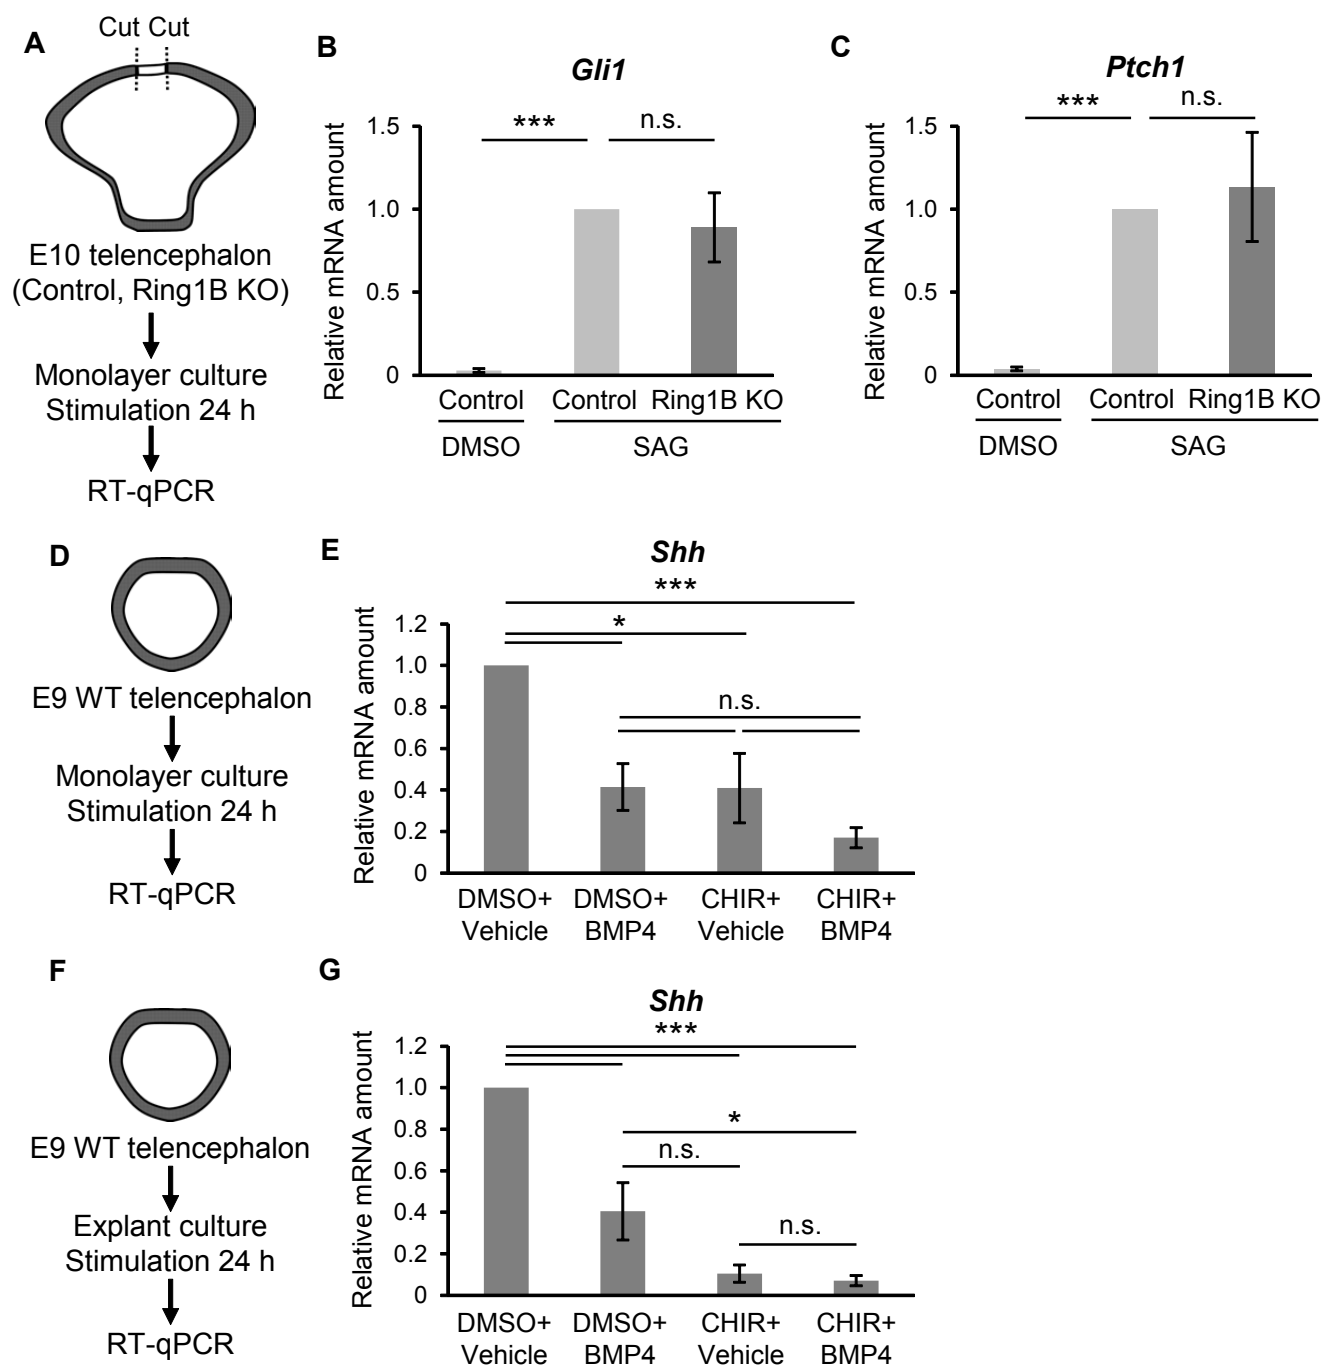

**Figure 9**

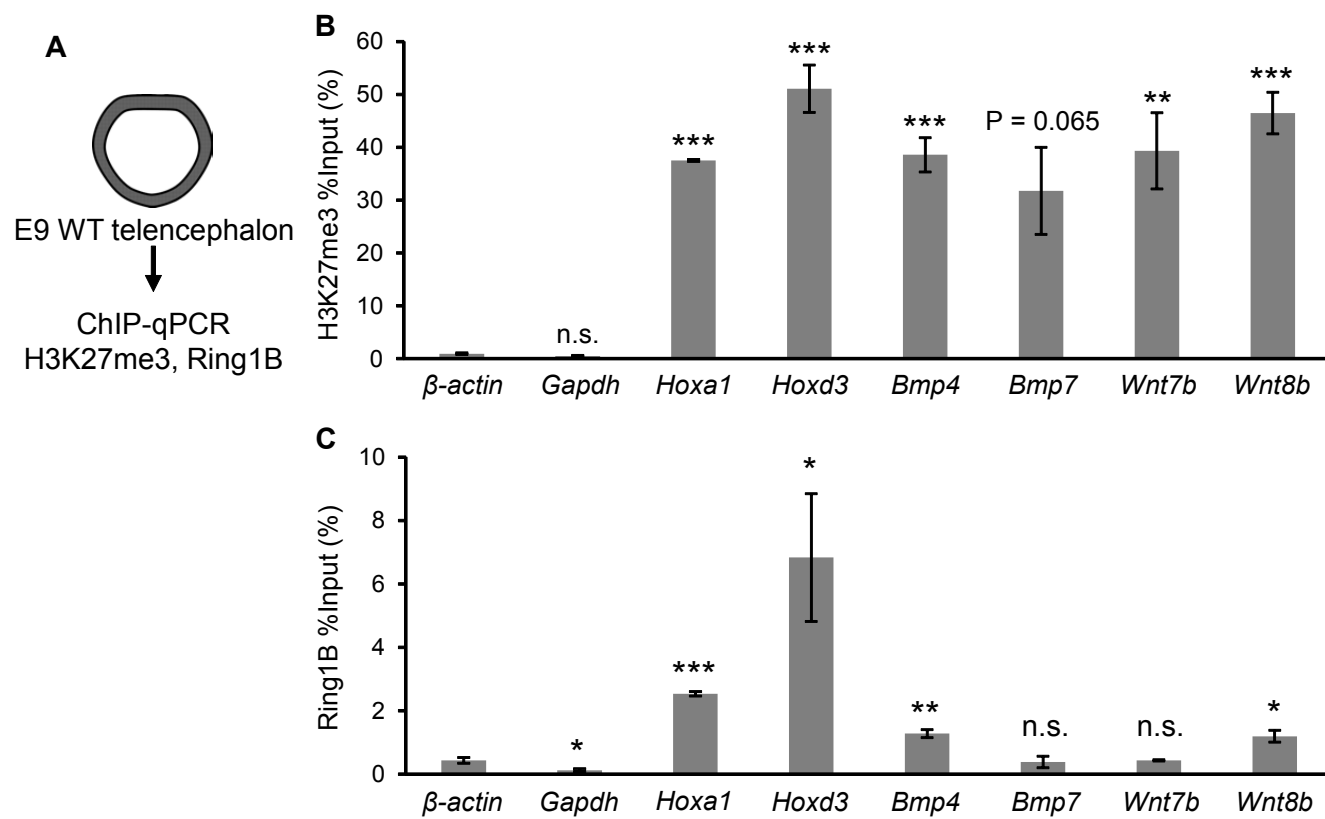

Figure 10

**Early-stage (E9-10) ventral telencephalon**

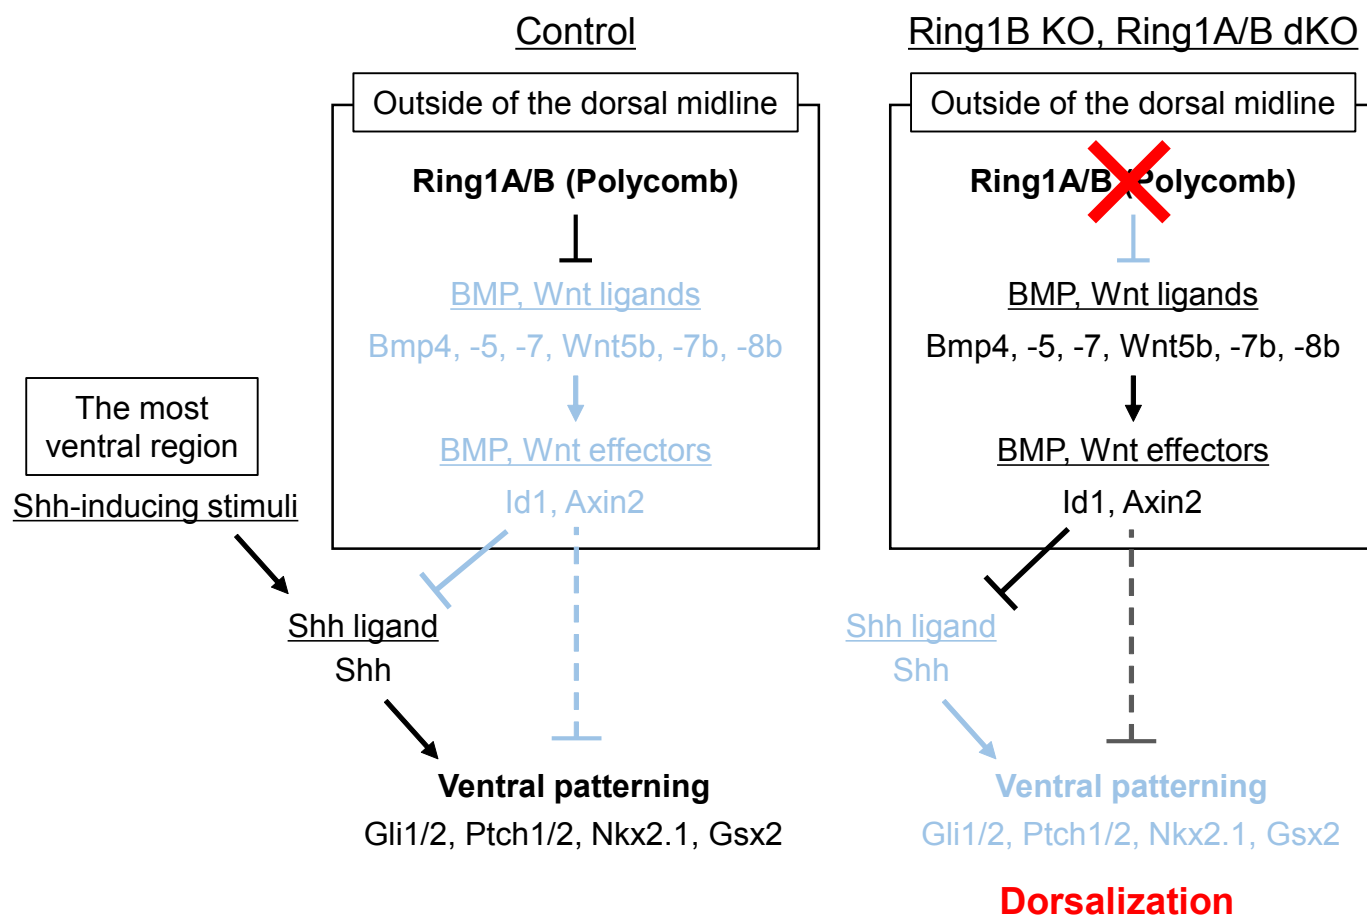

Source: https://www.biorxiv.org/content/10.1101/639492v1.full.pdf
